# Supplementary material for: δ-α cell-to-cell interactions modulate pancreatic islet Ca2+ oscillation modes
Source: Research Square preprint supplement (doi:10.21203/rs.3.rs-4952108/v1), 2024-09-20
Supplement: Supplementary file 1 [file 249b9228d23ecb6a725ace59.xlsx]

## Sheet: Fig.2
Fig. 2a	Alpha cell number	diameter (um)	Period (s)							Fig. 2c		Periods												Fig. 2d		Periods
			10G		gcg		sst				Alpha cell number group	10G (<10)	10G (10-40)	10G (40-100)	10G (>100)	gcg (<10)	gcg (10-40)	gcg (40-100)	gcg (>100)	sst (<10)	sst (10-40)	sst (40-100)	sst (>100)		islet size group	10G (80-150um)	10G (150-200um)	10G (200-300um)	gcg (80-150um)	gcg (150-200um)	gcg (200-300um)	sst (80-150um)	sst (150-200um)	sst (200-300um)
			fast	slow	fast	slow	fast	slow				159	26	18	18	19	10	14	21	211	393	259	367			171	22	149	28	21	24	259	367	259
	2	121	-	159	19	-	-	211				171	183	14	21	17	10	10	22	196	452	10	32			19	22	226	26	12	24	393	393	278
	3	123	-	171	17	-	-	196				211	18	211	24	21	18	30	17	319	393	319	21			259	298	16	14	12	14	452	422	278
	4	187	-	211	21	-	26	319				139	242	32	16	13	18	12	14	422	226	183	12			21	34	298	10	24	34	278	226	12
	6	98	21	259	26	-	-	393				21	171	22	22	26	24	24	11	393	278	393	278			226	171	15	14	26	21	211	422	298
	6	181	-	139	13	-	-	422				259	171	34	19	24	18	22	13	259	422	226	30			211	37	18	19	13	13	259	298	367
	6	203	-	149	24	-	-	259				149	226	21		28	19	10		259	422	393	12			11	139	19	18	10	11	226	298	12
	7	80	19	171	28	-	-	259				19	19	10		10	16	21		278	422	298				18	10	22	17	10	22	196	452	30
	9	165	-	298	12	-	-	422				171	278	22		10	14			367	452	367				159	242	21	18	22	17	422	32	393
	9	110	11	211	10	-	-	278				11	242			12	34			422	298					171	18	24	17	21		259	319	21
	9	126	10	342	10	-	-	367				211	226			26	15			298	342					171	21		10	30		367	183
	9	178	37	171	26	-	-	298				10	15				17				259					19	211		19			422
	11	142	26	183	10	-	-	393				342	298													30	32		10			319
	14	184	18	242	10	-	-	452				298	196													342			18			10
	14	132	171	-	18	-	-	393				37	30													10			15			393
	14	121	171	-	18	-	-	226				171														278			10			342
	15	205	-	226	24	-	-	278																		211			16			393
	16	124	19	-	18	-	-	422																		14						422
	19	126	-	278	19	-	-	422																		171
	24	142	-	242	16	-	-	422																		196
	26	107	-	226	14	-	-	452																		183
	28	221	15	298	34	-	-	298																		26
	36	135	-	196	15	-	-	342																		242
	39	124	30	-	17	-	-	259
	40	114	18	-	14	-	-	259			Kruskal-Wallis test	10G	gcg	sst											Kruskal-Wallis test	10G	gcg	sst
	44	129	14	211	10	-	10	319			P value	0.0145	0.9337	0.008											P value	0.4143	0.4356	0.1274
	51	197	32	-	30	-	-	183			P value summary	*	ns	**											P value summary	ns	ns	ns
	67	161	22	-	12	-	-	393			Do the medians vary signif. (P < 0.05)?	Yes	No	Yes											Do the medians vary signif. (P < 0.05)?	No	No	No
	69	165	34	-	24	-	-	226			Number of groups	4	4	4											Number of groups	3	3	3
	78	243	21	-	22	-	-	393			Kruskal-Wallis statistic	10.54	0.4315	11.83											Kruskal-Wallis statistic	1.763	1.662	4.12
	79	182	10	-	10	-	-	298
	79	158	22	-	21	-	-	367
	106	227	18	-	21	-	-	367
	119	185	21	-	22	-	32	-
	152	259	24	-	17	-	21	-
	204	218	16	-	14	-	12	278
	298	241	22	-	11	-	30	-
	300	239	19	-	13	-	12	-

## Sheet: Fig.3
Fig. 3b	Period (s)				Fig. 3c	cAMP (normalized to 3G)
	10G	10G+sst	10G+sst+gcg			10G	10G+sst	10G+sst+gcg
	21	52	30			0.44519	1.01335	0.101438
	211	226	24			0.790724	1.51401	0.413116
	28	42	34			1.23952	1.25838	0.456112
	21	196	32			0.72314	1.13539	0.184035
	24	85	34			0.527123	1.61702	0.0802481
	22	69	30			0.326679	1.39398	0.157103
	22	49	34			0.471385	2.76091	0.139114
	24	159	18			0.558498	3.03681	0.162775
	32	319	39			0.545475	1.12575	0.149865
	28	211	32			0.312952	0.935996	0.267705
	24	149	28			0.692545	3.34131	0.137155
	32	226	34
	18	159	24
	211	211	26
	30	367	45
	242	105	30
	26	39	32
	22	39	26
Test for normal distribution D'Agostino & Pearson test					Test for normal distribution D'Agostino & Pearson test
Group	10G	10G+sst	10G+sst+gcg		Group	10G	10G+sst	10G+sst+gcg
K2	13.53	1.58	1.755		K2	8.485	2.741	4.834
P value	0.0012	0.4538	0.4159		P value	0.0144	0.2539	0.0892
Passed normality test (alpha=0.05)?	No	Yes	Yes		Passed normality test (alpha=0.05)?	No	Yes	Yes
P value summary	**	ns	ns		P value summary	*	ns	ns
10G v.s. 10G+sst					10G v.s. 10G+gcg
Wilcoxon matched-pairs signed rank test					Wilcoxon matched-pairs signed rank test
P value	0.0008				P value	0.001
P value summary	***				P value summary	***
Significantly different (P < 0.05)?	Yes				Significantly different (P < 0.05)?	Yes
One- or two-tailed P value?	Two-tailed				One- or two-tailed P value?	Two-tailed
10G+sst v.s. 10G+sst+gcg					10G v.s. 10G+sst
Paired t test					Wilcoxon matched-pairs signed rank test
P value	<0.0001				P value	0.001
P value summary	****				P value summary	***
Significantly different (P < 0.05)?	Yes				Significantly different (P < 0.05)?	Yes
One- or two-tailed P value?	Two-tailed				One- or two-tailed P value?	Two-tailed
					10G+gcg v.s. 10G+sst
					Paired t test
					P value	0.0002
					P value summary	****
					Significantly different (P < 0.05)?	Yes
					One- or two-tailed P value?	Two-tailed
Fig. 3e mean +/- S.D.	Period (s)				Fig. 3f mean +/- S.D.	cAMP (normalized to 3G)				Fig. 3g mean +/- S.D.	Glucagon (pM)
	10G	CYN	10G (recovery)			10G	CYN	10G (recovery)			3G	10G	CYN
	139.6	16.25	177.1			0.358518	0.92477	0.273126			7.55	1.18	13.1
	42.94	14.38	96.76			0.433472	0.781585	0.161085			11.56	2.94	16.97
	60.17	11.55	94.55			0.475632	0.89113	0.277235			1.66	0.62	3.57
	118	17.94	97.36			0.231766	0.650063	0.209052			1.37	0.54	4.02
	104.1	14.25	52.66			0.312092	0.61599	0.265829			1.12	1.62	3.14
	220.5	12.77	231.7			0.295191	0.621158	0.213555			1.62	0	3.66
	171.2	13.01	185.7			0.531274	0.918804	0.326522			12.11	0	5.57
	46.25	12.81	115.9			0.377265	0.807343	0.327633			9	2.642	3.73
						0.396737	0.91646	0.573444			13.56	3.396	32.25
Test for normal distribution D'Agostino & Pearson test						0.377378	0.843067	0.325471			6.054	2.767	9
Group	10G	CYN	10G (recovery)								7.075	1.14	9.65
K2	0.583	1.508	0.7435		Test for normal distribution D'Agostino & Pearson test						9.517	1.14	14.61
P value	0.7472	0.4706	0.6895		Group	10G	CYN	10G (recovery)			1.69	1.265	13.03
Passed normality test (alpha=0.05)?	Yes	Yes	Yes		K2	0.05637	2.533	11.47			2.02	1.85	13.82
P value summary	ns	ns	ns		P value	0.9722	0.2819	0.0032				0	10.94
					Passed normality test (alpha=0.05)?	Yes	Yes	No				0	3.12
Tukey's multiple comparisons test	Mean Diff.	Summary	Adjusted P Value		P value summary	ns	ns	**					3.9
10G vs. CYN	98.73	**	0.0022										3.9
10G vs. 10G (recovery)	-18.62	ns	0.7428		Tukey's multiple comparisons test	Mean Diff.	Summary	Adjusted P Value
CYN vs. 10G (recovery)	-117.3	***	0.0004		10G vs. CYN	-0.4181	****	<0.0001		Test for normal distribution D'Agostino & Pearson test
					10G vs. 10G (recovery)	0.08364	ns	0.2143		Group	3G	10G	CYN
					CYN vs. 10G (recovery)	0.5017	****	<0.0001		K2	2.404	1.107	14.51
					Passed normality test (alpha=0.05)?	Yes	Yes	No		P value	0.3006	0.5749	0.0007
					P value summary	ns	ns	**		Passed normality test (alpha=0.05)?	Yes	Yes	No
										P value summary	ns	ns	***
										3G v.s. 10G
Fig. 3i left panel mean +/- S.D.	Period (s)				Fig. 3i right panel mean +/- S.D.	Period (s)				Mann Whitney test
	10G	CYN	10G (recovery)			10G	CYN	10G (recovery)		P value	0.0124
	26.07	19.82	215.3			37.88	14.88	108.3		P value summary	*
	27.69	23.91	103.6			13.02	12.25	134.1		Significantly different (P < 0.05)?	Yes
	17.84	16.48	131			181.9	20.95	183.8		One- or two-tailed P value?	Two-tailed
	26.6	26.46	83.32			143.8	25.56	137.4
	20.72	15.41	17.96			126	12.33	176.5		3G v.s. CYN
	13.51	13.82	45.66			194	25.87	184.9		Mann Whitney test
	15.11	15.45	13.85			28.85	16.3	101		P value	0.0914
										P value summary	ns
Test for normal distribution Kolmogorov-Smirnov test					Test for normal distribution Kolmogorov-Smirnov test					Significantly different (P < 0.05)?	No
KS distance	0.2334	0.2541	0.1517		KS distance	0.2355	0.2057	0.2294		One- or two-tailed P value?	Two-tailed
P value	>0.1000	>0.1000	>0.1000		P value	>0.1000	>0.1000	>0.1000
Passed normality test (alpha=0.05)?	Yes	Yes	Yes		Passed normality test (alpha=0.05)?	Yes	Yes	Yes		10G v.s. CYN
P value summary	ns	ns	ns		P value summary	ns	ns	ns		Unpaired t test
										P value	0.0025
Tukey's multiple comparisons test	Mean Diff.	Summary	Adjusted P Value		Tukey's multiple comparisons test	Mean Diff.	Summary	Adjusted P Value		P value summary	**
10G vs. CYN	2.313	ns	0.994		10G vs. CYN	85.33	*	0.0107		Significantly different (P < 0.05)?	Yes
10G vs. 10G (recovery)	-66.16	*	0.0204		10G vs. 10G (recovery)	-42.94	ns	0.2483		One- or two-tailed P value?	Two-tailed
CYN vs. 10G (recovery)	-68.48	*	0.0164		CYN vs. 10G (recovery)	-128.3	***	0.0003
Fig. 3k left panel mean +/- S.D.	Period (s)		Test for normal distribution D'Agostino & Pearson test				Fig. 3k right panel mean +/- S.D.	Tba (s)		Test for normal distribution D'Agostino & Pearson test
	10G	CYN	Group	10G	CYN			10G	CYN	Group	10G	CYN
	144	27	K2	1.794	53.99			12	3	K2	5.979	6.297
	144	33	P value	0.4078	<0.0001			15	12	P value	0.0503	0.0429
	138	42	Passed normality test (alpha=0.05)?	Yes	No			15	21	Passed normality test (alpha=0.05)?	Yes	No
	126	48	P value summary	ns	****			15	24	P value summary	ns	*
	204	27						42	15
	204	54						42	30
	60	45	10G v.s. CYN					15	27	10G v.s. CYN
	78	60	Mann Whitney test					21	36	Mann Whitney test
	66	63	P value	<0.0001				18	39	P value	0.4437
	72	24	P value summary	****				21	15	P value summary	ns
	51	48	Significantly different (P < 0.05)?	Yes				15	30	Significantly different (P < 0.05)?	No
	138	57	One- or two-tailed P value?	Two-tailed				42	36	One- or two-tailed P value?	Two-tailed
	63	27						21	18
	108	27						36	18
	51	45						18	30
	33	24						24	18
	63	24						60	18
		24							18
		24							18
		24							18
		24							18
		24							18
		24							18
		24							18
		24							18
		24							18
		24							18
		24							18
		24							18
		24							18
		24							18
		24							18
		24							18
		24							18
		24							18
		27							21
		21							18
		21							18
		21							18
		21							18
		27							24
		27							24
		27							24
		24							24
		27							27
		24							24
		24							24
		24							24
		27							27
		24							24
		24							24
		27							27
		27							27
		27							27
		27							27
		27							27
		27							27
		30							30
		24							24
		27							27
		24							24
		24							24
		24							24
		24							24
		24							24
		27							27
		24							24
		24							24
		21							21
		24							24
		27							27
		24							24
		24							24
		24							24
		24							24
		21							21

## Sheet: Fig.4
Fig. 4c mean +/- S.D.	Sst-Cre+/-;Ai35f/+ islet period (s)																										Fig. 4d mean +/- S.D.	control			stim						Fig. 4e mean +/- S.D.	Ai35f/+ islet period (s)						Sst-Cre+/- islet period (s)
	islet 1		islet 2		islet 3		islet 4		islet 5		islet 6																	P	P0	D	P	P0	D					islet 1		islet 2		islet 3		islet 1		islet 2		islet 3
	control	stim	control	stim	control	stim	control	stim	control	stim	control	stim																130	16	348	56	16	101.8					control	stim	control	stim	control	stim	control	stim	control	stim	control	stim
	32.4901	15.1572	21.4355	12.3114	49.2458	26.3902	45.9479	15.1572	28.2843	13.1951	56.5685	196.983																24	32	121	78	25	186.6					196.983	242.515	10	226.274	149.285	196.983	22.974	60.6287	18.6607	18.6607	42.8709	45.9479
	32.4901	15.1572	22.974	11.487	49.2458	24.6229	45.9479	15.1572	28.2843	12.3114	56.5685	196.983																14	13	77	69	9	106.2					196.983	242.515	10	226.274	149.285	196.983	22.974	60.6287	18.6607	18.6607	40	45.9479
	32.4901	15.1572	22.974	11.487	49.2458	24.6229	45.9479	15.1572	28.2843	12.3114	56.5685	211.121																35	23	110	41	16	153.5					196.983	259.921	10	226.274	149.285	196.983	22.974	60.6287	18.6607	17.411	40	45.9479
	32.4901	15.1572	22.974	11.487	49.2458	22.974	45.9479	15.1572	28.2843	12.3114	56.5685	211.121	Test for normal distribution D'Agostino & Pearson test															135	17	300	125	16	160.2					196.983	259.921	10	242.515	149.285	196.983	22.974	60.6287	18.6607	17.411	40	45.9479
	32.4901	15.1572	22.974	10.7177	49.2458	22.974	45.9479	15.1572	28.2843	12.3114	56.5685	211.121		islet 1		islet 2		islet 3		islet 4		islet 5		islet 6				42	27	300	24	16	48.02					196.983	259.921	10	242.515	149.285	196.983	22.974	60.6287	18.6607	17.411	40	45.9479
	32.4901	14.1421	24.6229	10.7177	49.2458	22.974	45.9479	15.1572	30.3143	12.3114	56.5685	211.121	Group	control	stim	control	stim	control	stim	control	stim	control	stim	control	stim													196.983	259.921	10	242.515	149.285	196.983	22.974	60.6287	18.6607	16.245	40	45.9479
	32.4901	14.1421	24.6229	10	49.2458	22.974	45.9479	15.1572	30.3143	12.3114	56.5685	16.245	K2	28.33	70.68	57.16	10.14	84.65	37.85	21.62	16.4	31.22	26.5	85.32	271.8													196.983	259.921	10	242.515	149.285	196.983	22.974	60.6287	18.6607	16.245	40	45.9479
	32.4901	14.1421	24.6229	10	49.2458	22.974	45.9479	15.1572	30.3143	13.1951	56.5685	16.245	P value	<0.0001	<0.0001	<0.0001	0.0063	<0.0001	<0.0001	<0.0001	0.0003	<0.0001	<0.0001	<0.0001	<0.0001													196.983	259.921	10	242.515	149.285	196.983	22.974	60.6287	18.6607	16.245	40	45.9479
	32.4901	14.1421	26.3902	10	49.2458	22.974	45.9479	15.1572	30.3143	13.1951	56.5685	15.1572	Passed normality test (alpha=0.05)?	No	No	No	No	No	No	No	No	No	No	No	No													196.983	259.921	10	242.515	149.285	196.983	22.974	60.6287	18.6607	16.245	40	45.9479
	32.4901	14.1421	26.3902	10	49.2458	22.974	45.9479	15.1572	30.3143	13.1951	56.5685	15.1572	P value summary	****	****	****	**	****	****	****	***	****	****	****	****													196.983	259.921	10	242.515	149.285	196.983	22.974	56.5685	18.6607	16.245	40	45.9479
	32.4901	14.1421	26.3902	10	49.2458	22.974	45.9479	15.1572	30.3143	13.1951	56.5685	15.1572																										196.983	259.921	196.983	242.515	149.285	196.983	22.974	56.5685	18.6607	16.245	40	45.9479
	32.4901	14.1421	26.3902	10	49.2458	22.974	45.9479	14.1421	30.3143	13.1951	56.5685	15.1572	Mann Whitney test control v.s. stim	islet 1	islet 2	islet 3	islet 4	islet 5	islet 6																			196.983	259.921	196.983	242.515	149.285	196.983	22.974	32.4901	18.6607	16.245	40	49.2458
	32.4901	14.1421	26.3902	10	49.2458	22.974	45.9479	14.1421	30.3143	13.1951	56.5685	15.1572	P value	<0.0001	<0.0001	<0.0001	<0.0001	<0.0001	<0.0001																			196.983	259.921	196.983	242.515	149.285	196.983	24.6229	30.3143	18.6607	17.411	40	49.2458
	32.4901	14.1421	26.3902	10	49.2458	22.974	45.9479	14.1421	30.3143	13.1951	56.5685	15.1572	P value summary	****	****	****	****	****	****																			196.983	259.921	196.983	242.515	149.285	196.983	24.6229	30.3143	18.6607	18.6607	40	49.2458
	32.4901	14.1421	26.3902	10	49.2458	22.974	49.2458	14.1421	30.3143	13.1951	56.5685	15.1572	Significantly different (P < 0.05)?	Yes	Yes	Yes	Yes	Yes	Yes																			196.983	259.921	196.983	242.515	149.285	196.983	24.6229	30.3143	18.6607	18.6607	40	49.2458
	32.4901	15.1572	26.3902	10	49.2458	22.974	49.2458	14.1421	30.3143	14.1421	56.5685	15.1572	One- or two-tailed P value?	Two-tailed	Two-tailed	Two-tailed	Two-tailed	Two-tailed	Two-tailed																			196.983	259.921	196.983	242.515	149.285	196.983	24.6229	28.2843	17.411	20	37.3213	45.9479
	32.4901	15.1572	26.3902	10	49.2458	22.974	49.2458	14.1421	30.3143	14.1421	56.5685	15.1572																										196.983	259.921	196.983	242.515	149.285	196.983	24.6229	28.2843	17.411	20	37.3213	45.9479
	32.4901	15.1572	26.3902	10	49.2458	22.974	49.2458	14.1421	32.4901	14.1421	56.5685	14.1421																										196.983	259.921	196.983	242.515	149.285	196.983	24.6229	28.2843	17.411	20	37.3213	45.9479
	32.4901	15.1572	26.3902	10	49.2458	22.974	49.2458	14.1421	32.4901	14.1421	56.5685	14.1421																										196.983	259.921	196.983	242.515	149.285	196.983	24.6229	28.2843	17.411	20	37.3213	45.9479
	32.4901	15.1572	26.3902	10	49.2458	22.974	49.2458	14.1421	32.4901	14.1421	56.5685	14.1421																										196.983	259.921	196.983	242.515	149.285	196.983	24.6229	28.2843	17.411	20	37.3213	45.9479
	32.4901	15.1572	24.6229	10	49.2458	22.974	49.2458	14.1421	32.4901	14.1421	56.5685	14.1421																										196.983	259.921	196.983	242.515	149.285	196.983	24.6229	28.2843	17.411	20	37.3213	45.9479
	32.4901	15.1572	22.974	10	49.2458	22.974	49.2458	14.1421	32.4901	14.1421	56.5685	14.1421																										196.983	259.921	196.983	242.515	149.285	196.983	24.6229	28.2843	17.411	20	37.3213	45.9479
	32.4901	15.1572	21.4355	10	49.2458	22.974	49.2458	14.1421	32.4901	14.1421	56.5685	14.1421																										196.983	259.921	196.983	242.515	149.285	196.983	24.6229	28.2843	17.411	20	37.3213	45.9479
	32.4901	15.1572	20	10	49.2458	22.974	49.2458	14.1421	32.4901	14.1421	56.5685	14.1421																										196.983	259.921	196.983	242.515	149.285	196.983	24.6229	28.2843	17.411	20	34.822	45.9479
	56.5685	14.1421	20	10	49.2458	22.974	49.2458	14.1421	32.4901	14.1421	56.5685	14.1421																										196.983	259.921	196.983	242.515	149.285	196.983	24.6229	28.2843	17.411	20	34.822	45.9479
	56.5685	15.1572	20	10.7177	49.2458	22.974	49.2458	14.1421	32.4901	14.1421	56.5685	14.1421																										196.983	259.921	196.983	242.515	149.285	196.983	24.6229	28.2843	17.411	18.6607	34.822	45.9479
	56.5685	15.1572	20	10.7177	49.2458	22.974	49.2458	14.1421	32.4901	14.1421	56.5685	14.1421																										196.983	259.921	196.983	242.515	149.285	196.983	24.6229	28.2843	16.245	18.6607	32.4901	45.9479
	56.5685	15.1572	20	10.7177	49.2458	22.974	49.2458	14.1421	32.4901	14.1421	56.5685	14.1421																										196.983	259.921	196.983	242.515	149.285	196.983	24.6229	30.3143	16.245	18.6607	32.4901	45.9479
	56.5685	15.1572	20	10.7177	49.2458	24.6229	52.7803	14.1421	32.4901	14.1421	56.5685	14.1421																										196.983	259.921	196.983	242.515	149.285	196.983	24.6229	30.3143	16.245	18.6607	32.4901	42.8709
	56.5685	15.1572	20	10.7177	49.2458	24.6229	52.7803	14.1421	34.822	14.1421	56.5685	14.1421																										196.983	259.921	196.983	242.515	149.285	196.983	24.6229	30.3143	16.245	17.411	32.4901	42.8709
	56.5685	15.1572	20	10.7177	49.2458	24.6229	52.7803	14.1421	34.822	14.1421	56.5685	14.1421																										196.983	259.921	196.983	242.515	149.285	196.983	24.6229	30.3143	16.245	17.411	30.3143	42.8709
	56.5685	14.1421	20	10.7177	49.2458	24.6229	52.7803	14.1421	34.822	14.1421	56.5685	14.1421																										211.121	259.921	196.983	242.515	149.285	196.983	24.6229	56.5685	16.245	17.411	30.3143	42.8709
	60.6287	14.1421	20	10.7177	49.2458	24.6229	52.7803	14.1421	34.822	14.1421	56.5685	14.1421																										211.121	259.921	196.983	242.515	149.285	183.792	24.6229	56.5685	16.245	17.411	30.3143	40
	60.6287	14.1421	20	10.7177	49.2458	24.6229	52.7803	14.1421	34.822	14.1421	56.5685	14.1421																										211.121	259.921	196.983	242.515	149.285	183.792	24.6229	56.5685	16.245	17.411	30.3143	40
	60.6287	14.1421	20	11.487	49.2458	26.3902	52.7803	14.1421	34.822	14.1421	56.5685	14.1421																										211.121	259.921	196.983	242.515	149.285	183.792	24.6229	56.5685	16.245	17.411	30.3143	40
	60.6287	14.1421	20	11.487	49.2458	26.3902	52.7803	14.1421	34.822	15.1572	56.5685	14.1421																										211.121	259.921	196.983	242.515	149.285	183.792	24.6229	56.5685	16.245	17.411	30.3143	40
	60.6287	14.1421	20	11.487	49.2458	26.3902	52.7803	14.1421	34.822	15.1572	56.5685	14.1421																										211.121	259.921	196.983	242.515	149.285	183.792	24.6229	56.5685	16.245	17.411	30.3143	40
	60.6287	14.1421	26.3902	11.487	49.2458	26.3902	52.7803	14.1421	34.822	15.1572	52.7803	14.1421																										211.121	259.921	196.983	242.515	149.285	183.792	24.6229	56.5685	16.245	16.245	30.3143	40
	60.6287	14.1421	26.3902	12.3114	49.2458	26.3902	52.7803	15.1572	34.822	15.1572	52.7803	14.1421																										211.121	259.921	196.983	242.515	149.285	183.792	24.6229	56.5685	16.245	16.245	30.3143	40
	60.6287	14.1421	26.3902	12.3114	49.2458	26.3902	52.7803	15.1572	34.822	15.1572	52.7803	14.1421																										211.121	259.921	196.983	242.515	149.285	183.792	24.6229	60.6287	16.245	16.245	30.3143	40
	60.6287	14.1421	26.3902	12.3114	49.2458	26.3902	52.7803	15.1572	34.822	15.1572	52.7803	14.1421																										211.121	259.921	196.983	242.515	149.285	183.792	24.6229	60.6287	17.411	16.245	30.3143	40
	60.6287	14.1421	26.3902	12.3114	49.2458	26.3902	52.7803	15.1572	34.822	15.1572	52.7803	14.1421																										211.121	259.921	196.983	242.515	149.285	183.792	24.6229	60.6287	17.411	16.245	30.3143	40
	64.9802	14.1421	28.2843	12.3114	49.2458	26.3902	52.7803	15.1572	37.3213	15.1572	52.7803	14.1421																										211.121	259.921	196.983	242.515	149.285	183.792	24.6229	60.6287	17.411	16.245	30.3143	40
	64.9802	14.1421	28.2843	12.3114	49.2458	26.3902	56.5685	15.1572	37.3213	15.1572	52.7803	14.1421																										211.121	259.921	196.983	242.515	149.285	183.792	24.6229	60.6287	17.411	15.1572	30.3143	40
	64.9802	14.1421	28.2843	12.3114	49.2458	28.2843	56.5685	15.1572	37.3213	15.1572	52.7803	14.1421																										211.121	259.921	196.983	242.515	149.285	183.792	24.6229	60.6287	17.411	15.1572	30.3143	40
	64.9802	14.1421	28.2843	13.1951	49.2458	28.2843	56.5685	16.245	37.3213	15.1572	52.7803	14.1421																										211.121	259.921	196.983	242.515	149.285	183.792	24.6229	60.6287	17.411	15.1572	30.3143	40
	69.644	14.1421	69.644	13.1951	49.2458	28.2843	56.5685	16.245	37.3213	15.1572	52.7803	14.1421																										211.121	259.921	196.983	242.515	149.285	183.792	24.6229	60.6287	17.411	18.6607	30.3143	40
	69.644	14.1421	69.644	13.1951	49.2458	28.2843	56.5685	18.6607	37.3213	15.1572	52.7803	14.1421																										211.121	259.921	196.983	242.515	149.285	183.792	24.6229	60.6287	17.411	20	30.3143	40
	69.644	14.1421	69.644	13.1951	49.2458	28.2843	56.5685	18.6607	37.3213	15.1572	52.7803	14.1421																										211.121	259.921	196.983	242.515	149.285	183.792	24.6229	60.6287	17.411	20	30.3143	40
	74.6426	21.4355	69.644	13.1951	49.2458	28.2843	56.5685	18.6607	40	15.1572	52.7803	14.1421																										211.121	259.921	196.983	242.515	149.285	183.792	24.6229	60.6287	16.245	20	30.3143	40
	74.6426	21.4355	30.3143	14.1421	49.2458	26.3902	56.5685	17.411	37.3213	15.1572	52.7803	14.1421																										211.121	259.921	196.983	242.515	149.285	183.792	24.6229	60.6287	16.245	20	30.3143	40
	26.3902	21.4355	18.6607	10.7177	49.2458	26.3902	49.2458	17.411	37.3213	24.6229	52.7803	15.1572																										211.121	259.921	196.983	242.515	149.285	183.792	91.8959	60.6287	16.245	20	69.644	64.9802
	26.3902	21.4355	18.6607	10	49.2458	26.3902	49.2458	17.411	37.3213	24.6229	52.7803	15.1572																										211.121	259.921	196.983	242.515	160	183.792	85.7419	56.5685	15.1572	20	69.644	64.9802
	26.3902	21.4355	18.6607	10.7177	49.2458	26.3902	49.2458	17.411	37.3213	24.6229	52.7803	15.1572																										211.121	259.921	196.983	242.515	160	183.792	85.7419	56.5685	15.1572	20	69.644	64.9802
	37.3213	21.4355	18.6607	11.487	49.2458	26.3902	49.2458	16.245	37.3213	24.6229	52.7803	15.1572																										211.121	259.921	12.3114	242.515	160	183.792	85.7419	56.5685	15.1572	20	69.644	64.9802
	37.3213	21.4355	18.6607	12.3114	49.2458	26.3902	49.2458	16.245	37.3213	24.6229	52.7803	15.1572																										211.121	259.921	12.3114	242.515	160	183.792	85.7419	56.5685	15.1572	20	69.644	64.9802
	37.3213	21.4355	18.6607	12.3114	49.2458	26.3902	49.2458	16.245	40	24.6229	52.7803	15.1572																										211.121	259.921	12.3114	242.515	160	183.792	85.7419	56.5685	15.1572	20	69.644	64.9802
	37.3213	21.4355	18.6607	12.3114	49.2458	26.3902	49.2458	16.245	40	24.6229	52.7803	15.1572																										211.121	259.921	11.487	242.515	160	183.792	85.7419	56.5685	15.1572	20	74.6426	64.9802
	37.3213	21.4355	17.411	12.3114	49.2458	26.3902	49.2458	16.245	40	24.6229	52.7803	15.1572																										211.121	259.921	11.487	242.515	160	183.792	85.7419	56.5685	16.245	20	74.6426	64.9802
	37.3213	21.4355	17.411	12.3114	49.2458	26.3902	49.2458	16.245	40	24.6229	52.7803	15.1572																										211.121	259.921	11.487	242.515	160	183.792	85.7419	56.5685	16.245	20	74.6426	64.9802
	37.3213	21.4355	17.411	13.1951	49.2458	26.3902	49.2458	16.245	40	24.6229	52.7803	15.1572																										211.121	259.921	11.487	242.515	160	183.792	85.7419	56.5685	16.245	20	74.6426	64.9802
	37.3213	21.4355	17.411	13.1951	52.7803	26.3902	49.2458	16.245	40	24.6229	56.5685	15.1572																										211.121	259.921	10.7177	242.515	160	183.792	85.7419	56.5685	16.245	18.6607	74.6426	64.9802
	37.3213	21.4355	17.411	13.1951	52.7803	26.3902	49.2458	16.245	40	24.6229	56.5685	15.1572																										211.121	259.921	10.7177	242.515	160	183.792	85.7419	56.5685	17.411	18.6607	74.6426	64.9802
	37.3213	21.4355	17.411	13.1951	52.7803	26.3902	45.9479	16.245	40	24.6229	56.5685	15.1572																										211.121	259.921	10.7177	242.515	160	183.792	85.7419	56.5685	17.411	18.6607	74.6426	64.9802
	37.3213	21.4355	17.411	13.1951	52.7803	26.3902	45.9479	16.245	40	24.6229	56.5685	15.1572																										211.121	259.921	10.7177	242.515	160	183.792	85.7419	56.5685	17.411	18.6607	74.6426	64.9802
	49.2458	21.4355	17.411	13.1951	52.7803	28.2843	45.9479	15.1572	40	24.6229	56.5685	15.1572																										211.121	259.921	10.7177	242.515	160	183.792	85.7419	56.5685	18.6607	18.6607	74.6426	64.9802
	49.2458	21.4355	30.3143	13.1951	52.7803	28.2843	45.9479	15.1572	40	24.6229	56.5685	15.1572																										211.121	259.921	10.7177	242.515	160	183.792	85.7419	56.5685	18.6607	17.411	34.822	64.9802
	49.2458	21.4355	30.3143	13.1951	52.7803		45.9479	15.1572	40	24.6229	56.5685	15.1572																										211.121	259.921	10.7177	242.515	160	183.792	85.7419	56.5685	18.6607	17.411	34.822	64.9802
	49.2458	21.4355	30.3143	13.1951	52.7803		45.9479	15.1572	40	24.6229	56.5685	15.1572																										211.121	259.921	10.7177	242.515	171.484	183.792	85.7419	56.5685	18.6607	17.411	34.822	64.9802
	49.2458	21.4355	32.4901	13.1951	52.7803		45.9479	15.1572	40	24.6229	28.2843	15.1572																										211.121	259.921	10.7177	242.515	171.484	183.792	85.7419	56.5685	18.6607	17.411	34.822	64.9802
	49.2458	21.4355	32.4901	13.1951	52.7803		45.9479	15.1572	40	24.6229	28.2843	16.245																										211.121	259.921	10.7177	242.515	171.484	183.792	85.7419	56.5685	18.6607	16.245	34.822	64.9802
	49.2458	20	32.4901	13.1951	52.7803		45.9479	15.1572	40	24.6229	28.2843	16.245																										211.121	259.921	10.7177	242.515	171.484	183.792	85.7419	56.5685	18.6607	16.245	34.822	64.9802
	49.2458	20	32.4901	13.1951	52.7803		45.9479	15.1572	40	18.6607	28.2843	16.245																										211.121	259.921	10	242.515	171.484	183.792	85.7419	56.5685	18.6607	16.245	34.822	64.9802
	49.2458	20	32.4901	13.1951	52.7803		45.9479	15.1572	40	18.6607	28.2843	16.245																										211.121	259.921	10.7177	242.515	171.484	183.792	85.7419	56.5685	18.6607	16.245	34.822	64.9802
	49.2458	20	32.4901	13.1951	52.7803		45.9479	15.1572	40	18.6607	28.2843	16.245																										211.121	259.921	211.121	242.515	171.484	183.792	85.7419	56.5685	18.6607	16.245	34.822	64.9802
	49.2458	20	32.4901	13.1951	52.7803		45.9479	15.1572	40	18.6607	28.2843	16.245																										226.274	259.921	211.121	242.515	171.484	183.792	85.7419	24.6229	18.6607	17.411	32.4901	64.9802
	49.2458	18.6607	32.4901	14.1421	52.7803		45.9479	15.1572	40	18.6607	26.3902	16.245																										226.274	259.921	211.121	242.515	171.484	183.792	85.7419	24.6229	18.6607	17.411	32.4901	64.9802
	49.2458	18.6607	32.4901	14.1421	52.7803		42.8709	15.1572	40	18.6607	26.3902	17.411																										226.274	259.921	211.121	242.515	171.484	183.792	85.7419	24.6229	17.411	17.411	32.4901	64.9802
	49.2458	18.6607	32.4901	14.1421	52.7803		42.8709	15.1572	40	18.6607	26.3902	17.411																										226.274	259.921	211.121	242.515	171.484	183.792	85.7419	22.974	17.411	17.411	32.4901	64.9802
	49.2458	18.6607	32.4901	14.1421	52.7803		42.8709	15.1572	40	18.6607	26.3902	17.411																										226.274	259.921	211.121	242.515	171.484	183.792	85.7419	22.974	17.411	17.411	32.4901	64.9802
	49.2458	18.6607	32.4901	13.1951	52.7803		42.8709	15.1572	40	18.6607	26.3902	17.411																										226.274	259.921	211.121	242.515	171.484	183.792	85.7419	22.974	17.411	17.411	32.4901	64.9802
	49.2458	18.6607	30.3143	13.1951	52.7803		42.8709	15.1572	40	18.6607	26.3902	18.6607																										226.274	259.921	211.121	242.515	171.484	183.792	85.7419	22.974	17.411	18.6607	32.4901	64.9802
	49.2458	18.6607	30.3143	13.1951	52.7803		42.8709	16.245	40	17.411	26.3902	18.6607																										226.274	259.921	211.121	242.515	171.484	183.792	85.7419	22.974	17.411	18.6607	32.4901	64.9802
	49.2458	18.6607	30.3143	13.1951	52.7803		45.9479	16.245	40	17.411	26.3902	18.6607																										226.274	259.921	211.121	242.515	171.484	183.792	85.7419		16.245	18.6607	32.4901	64.9802
	49.2458	17.411	30.3143	13.1951	52.7803		45.9479	16.245	40	17.411	26.3902	18.6607																										226.274	259.921	211.121	242.515	183.792	183.792	85.7419		16.245	18.6607	32.4901	64.9802
	49.2458	17.411	30.3143	13.1951	52.7803		45.9479	17.411	40	17.411	26.3902	18.6607																										226.274	259.921	211.121	242.515	183.792	183.792	85.7419		16.245	18.6607	32.4901	64.9802
	49.2458	17.411	30.3143	13.1951	52.7803		32.4901	17.411	40	17.411	24.6229	18.6607																										226.274	259.921	211.121	242.515	183.792	183.792	85.7419		16.245	20	32.4901	64.9802
	52.7803	17.411	30.3143	13.1951	52.7803		32.4901	17.411	40	17.411	24.6229	18.6607																										226.274	259.921	211.121	242.515	183.792	183.792	85.7419		16.245	20	32.4901	64.9802
	52.7803	17.411	30.3143	13.1951	52.7803		32.4901	17.411	37.3213	17.411	24.6229	18.6607																										226.274	259.921	211.121	242.515	183.792	183.792	85.7419		16.245	20	32.4901	64.9802
	52.7803	17.411	32.4901	13.1951	52.7803		30.3143	18.6607	37.3213	16.245	24.6229	18.6607																										226.274	259.921	211.121	242.515	183.792	183.792	85.7419		16.245		32.4901	64.9802
	52.7803	17.411	32.4901	14.1421	49.2458		30.3143	14.1421	37.3213	16.245	24.6229	18.6607																										226.274	259.921	211.121	242.515	183.792	183.792	85.7419		16.245		32.4901	64.9802
	52.7803	17.411	32.4901	14.1421	49.2458		30.3143	14.1421	37.3213	16.245	24.6229	18.6607																										226.274	259.921	211.121	242.515	183.792	183.792	85.7419		16.245		32.4901	64.9802
	52.7803	17.411	52.7803	14.1421	49.2458		30.3143	14.1421	37.3213	16.245	24.6229	20																										242.515	259.921	211.121	242.515	183.792	183.792	85.7419		16.245		32.4901	64.9802
	52.7803	16.245	52.7803	14.1421	49.2458		30.3143	14.1421	37.3213	16.245	24.6229	20																										242.515	259.921	211.121	242.515	183.792	183.792	85.7419		16.245		32.4901	64.9802
	52.7803	16.245	52.7803	14.1421	49.2458		30.3143	14.1421	34.822	15.1572	24.6229	20																											259.921	211.121	242.515	183.792	183.792	85.7419		16.245		32.4901	64.9802
	69.644	16.245	56.5685	14.1421	49.2458		30.3143	14.1421	34.822	15.1572	22.974	20																											259.921	211.121	242.515	183.792	183.792	85.7419		16.245		32.4901	64.9802
	69.644	16.245	56.5685	14.1421	49.2458		30.3143	14.1421	34.822	15.1572	22.974	20																											259.921	211.121	242.515	183.792	183.792	85.7419		17.411		32.4901	64.9802
	69.644	16.245	56.5685	14.1421	49.2458		28.2843	14.1421	32.4901	15.1572	22.974	20																											259.921	211.121	242.515	183.792	183.792	85.7419		18.6607		32.4901	64.9802
	69.644	16.245	60.6287	14.1421	49.2458		28.2843	15.1572	32.4901	15.1572	22.974	20																											259.921	211.121	242.515	183.792	183.792	85.7419		18.6607		32.4901	64.9802
	74.6426	16.245	60.6287	15.1572	49.2458		28.2843	15.1572	32.4901	15.1572	22.974	20																											259.921	211.121	242.515	183.792	183.792	85.7419		20		32.4901	64.9802
	74.6426		60.6287	15.1572	49.2458		28.2843	15.1572	32.4901	15.1572	22.974	20																											259.921	211.121	242.515	183.792	183.792	85.7419				32.4901	64.9802
	74.6426		91.8959	15.1572	49.2458		28.2843	15.1572		16.245	22.974	20																											259.921	211.121	242.515	183.792	183.792	85.7419				32.4901	64.9802
	60.6287		91.8959	15.1572	49.2458		28.2843	16.245		16.245	22.974	20																											259.921	226.274	242.515	183.792	183.792
	60.6287		91.8959	15.1572	49.2458		28.2843	16.245		16.245	22.974	20																											259.921	226.274	242.515	183.792	183.792
	60.6287		91.8959	15.1572	49.2458		28.2843	16.245		16.245	21.4355	20																											259.921	226.274	242.515	183.792	183.792
	60.6287		91.8959	15.1572	49.2458		28.2843	16.245		16.245	21.4355	20																											259.921	226.274	242.515	183.792	183.792
	60.6287		91.8959	16.245	49.2458		28.2843	16.245		16.245	21.4355	20																											259.921	211.121	242.515	183.792	183.792
	60.6287		91.8959	16.245	49.2458		28.2843	16.245		16.245	21.4355	20																											259.921	211.121	242.515	183.792	183.792
	60.6287		91.8959	16.245	49.2458		28.2843			16.245	21.4355	20																											259.921	211.121	242.515	183.792	183.792
	60.6287		42.8709	16.245	49.2458		28.2843			16.245	21.4355	20																											259.921	211.121	242.515	183.792	183.792
	60.6287		42.8709	17.411	49.2458		28.2843			16.245	22.974	20																											259.921	211.121	242.515	183.792	183.792
	60.6287		42.8709	17.411	49.2458		28.2843			16.245	22.974	20																											259.921	211.121	242.515	183.792	183.792
	60.6287		42.8709	17.411	49.2458		28.2843			16.245	24.6229	18.6607																											259.921	211.121	242.515	183.792	183.792
	60.6287		42.8709	17.411	49.2458		28.2843			15.1572	259.921	18.6607																											259.921	211.121	242.515	183.792	183.792
	60.6287		42.8709	17.411	49.2458		28.2843			15.1572	196.983	18.6607																											259.921	211.121	242.515	183.792	183.792
	60.6287		42.8709	17.411	49.2458		28.2843			15.1572	196.983	18.6607																											259.921	211.121	242.515	183.792	183.792
	60.6287		42.8709	17.411	49.2458		28.2843			14.1421	196.983	17.411																											259.921	211.121	242.515	183.792	183.792
	60.6287		42.8709	17.411	49.2458		28.2843			14.1421	196.983	17.411																											259.921	211.121	242.515	183.792	183.792
	60.6287		40	17.411	49.2458		28.2843			14.1421	196.983	17.411																											259.921	211.121	242.515	183.792	183.792
			40	16.245	49.2458		28.2843			14.1421	196.983	17.411																											259.921	211.121	242.515	196.983	183.792
			40	16.245	49.2458		28.2843			14.1421	196.983	17.411																											259.921	211.121	242.515	196.983	183.792
			40	16.245	49.2458		28.2843			15.1572	196.983	17.411																											259.921	211.121	242.515	196.983	183.792
			40	15.1572	49.2458		28.2843			15.1572	196.983	16.245																											259.921	211.121	242.515	196.983	183.792
			40	15.1572	49.2458		74.6426			15.1572	196.983	16.245																											259.921	211.121	242.515	196.983	183.792
			40	15.1572	49.2458		74.6426			15.1572	196.983	16.245																											259.921	211.121	242.515	196.983	183.792
			40	15.1572	49.2458		74.6426			15.1572	196.983	16.245																											259.921	211.121	242.515	196.983	183.792
			40	15.1572	49.2458		74.6426			15.1572	196.983	16.245																											259.921	211.121	242.515	196.983	183.792
			40	15.1572	49.2458		74.6426			16.245	196.983	16.245																											259.921	211.121	242.515	196.983	183.792
			37.3213	15.1572	49.2458		74.6426			16.245	196.983	16.245																											259.921	211.121	242.515	196.983	183.792
			37.3213	15.1572	49.2458		74.6426			16.245	196.983	17.411																											259.921	211.121	242.515	196.983	183.792
			37.3213	15.1572	52.7803		74.6426			16.245	196.983	17.411																											259.921	211.121	242.515	196.983	183.792
			32.4901	15.1572	52.7803		74.6426			17.411	196.983	17.411																											259.921	211.121	242.515	196.983	183.792
			32.4901	15.1572	52.7803		74.6426				196.983	17.411																											259.921	211.121	242.515	196.983	183.792
			32.4901	15.1572	52.7803		74.6426				196.983	17.411																											259.921	211.121	242.515	196.983	183.792
			32.4901	15.1572	85.7419		74.6426				60.6287	17.411																											259.921	211.121	242.515	196.983	183.792
			32.4901	15.1572	85.7419		74.6426				60.6287	17.411																											259.921	211.121	242.515	196.983	183.792
			32.4901	15.1572	85.7419		74.6426				56.5685	17.411																											259.921	211.121	242.515	196.983	183.792
			32.4901	15.1572	85.7419		69.644				56.5685	18.6607																											259.921	211.121	242.515	196.983	183.792
			34.822	15.1572	85.7419		69.644				56.5685	18.6607																											259.921	211.121	242.515	196.983	183.792
			37.3213	15.1572	85.7419		69.644				56.5685	18.6607																											259.921	211.121	242.515	196.983	183.792
			37.3213	15.1572	85.7419		69.644				56.5685	18.6607																											259.921	211.121	242.515	196.983	183.792
			37.3213	15.1572	85.7419		69.644				56.5685	13.1951																											259.921	211.121	242.515	196.983	183.792
			37.3213	15.1572	85.7419		69.644				56.5685	13.1951																											259.921	211.121	242.515	196.983	183.792
			40	14.1421	91.8959		69.644				56.5685	13.1951																											242.515	211.121	242.515	196.983	183.792
			40	14.1421	91.8959		69.644				56.5685	13.1951																											242.515	211.121	242.515	196.983	183.792
			40	14.1421	91.8959		69.644				56.5685	13.1951																											242.515	211.121	242.515	196.983	183.792
			40	14.1421	91.8959		69.644				56.5685	13.1951																											242.515	211.121	242.515	196.983	183.792
			40	14.1421	91.8959		69.644				56.5685	13.1951																											242.515	211.121	242.515	196.983	183.792
			98.4916	14.1421	91.8959		69.644				56.5685	13.1951																											242.515	211.121	242.515	196.983	183.792
			98.4916	14.1421	91.8959		69.644				56.5685	13.1951																											242.515	11.487	242.515	196.983	183.792
			98.4916	14.1421	85.7419		69.644				56.5685	14.1421																												10	278.576	196.983
			98.4916	14.1421	85.7419		69.644				56.5685	14.1421																												10	278.576	196.983
				15.1572	85.7419		69.644				56.5685	14.1421																												10	278.576	196.983
					85.7419		74.6426				56.5685	14.1421																												10	278.576	196.983
					85.7419		74.6426				56.5685	14.1421																												10	278.576	196.983
					85.7419		74.6426				56.5685	14.1421																												10	278.576	196.983
					85.7419		74.6426				56.5685	14.1421																												10	278.576	196.983
					85.7419		74.6426				56.5685	14.1421																												10	278.576	196.983
					85.7419		74.6426				56.5685	14.1421																												10	278.576	196.983
					85.7419		74.6426				56.5685	14.1421																												10	278.576	196.983
					85.7419		32.4901				56.5685	14.1421																												10	278.576	196.983
					85.7419		32.4901				56.5685	14.1421																												10	278.576	196.983
					85.7419		32.4901				56.5685	14.1421																												211.121	278.576	196.983
					85.7419		32.4901				56.5685	14.1421																												211.121	278.576	196.983
					85.7419		32.4901				56.5685	14.1421																												211.121	278.576	196.983
					85.7419		32.4901				56.5685	14.1421																												211.121	278.576	196.983
					85.7419		32.4901				56.5685	14.1421																												211.121	278.576	196.983
					85.7419		32.4901				56.5685	14.1421																												211.121	278.576	196.983
					85.7419		32.4901				56.5685	14.1421																												211.121	278.576	196.983
					85.7419						56.5685	14.1421																												211.121	278.576	196.983
					85.7419						56.5685	15.1572																												211.121	278.576	196.983
					85.7419						56.5685	15.1572																												211.121	278.576	196.983
					85.7419						60.6287	14.1421																												211.121	278.576	196.983
					85.7419						60.6287	14.1421																												211.121	278.576	211.121
					85.7419						60.6287	14.1421																												211.121	278.576	211.121
					85.7419						60.6287	14.1421																												211.121	278.576	211.121
					85.7419						60.6287	14.1421																												211.121	278.576	211.121
					85.7419						60.6287	14.1421																												211.121	278.576	211.121
					52.7803						60.6287	14.1421																												211.121	278.576	211.121
					52.7803						60.6287	14.1421																												211.121	278.576	211.121
					52.7803						60.6287	14.1421																												211.121	278.576	211.121
					52.7803						60.6287	14.1421																												211.121	278.576	211.121
					52.7803						64.9802	14.1421																												211.121	278.576	211.121
					52.7803						64.9802	14.1421																												211.121	278.576	211.121
					52.7803						64.9802	14.1421																												211.121	278.576	211.121
					85.7419						64.9802	14.1421																												211.121	278.576	211.121
					85.7419						64.9802	14.1421																												211.121	278.576	211.121
					49.2458						64.9802	14.1421																												211.121	278.576	211.121
					49.2458						64.9802	15.1572																												211.121	278.576	211.121
					49.2458						183.792	15.1572																												211.121	278.576	211.121
					49.2458						183.792	15.1572																												211.121	278.576	211.121
					49.2458						183.792	15.1572																												226.274	278.576	211.121
					49.2458						183.792	15.1572																												226.274	278.576	211.121
					49.2458						183.792	15.1572																												226.274	278.576	211.121
					49.2458						139.288	16.245																												226.274	278.576	211.121
					49.2458						139.288	16.245																												226.274	278.576	211.121
					49.2458						139.288	16.245																												226.274	278.576	211.121
					49.2458						139.288	17.411																												226.274	278.576	211.121
					49.2458						139.288	17.411																												226.274	278.576	211.121
					49.2458						139.288	17.411																												226.274	278.576	211.121
					49.2458						139.288	17.411																												226.274	278.576	211.121
					49.2458						139.288	18.6607																												226.274	278.576	211.121
					49.2458						139.288	18.6607																												226.274	278.576	211.121
					49.2458						139.288	18.6607																												242.515	278.576	211.121
					49.2458						139.288	18.6607																												242.515	278.576	211.121
					49.2458						139.288	18.6607																												242.515	278.576	211.121
					49.2458						139.288	18.6607																												242.515	278.576	211.121
					49.2458						139.288	20																												242.515	278.576	211.121
					49.2458						139.288	20																												242.515	278.576	211.121
					49.2458						139.288	20																												242.515	278.576	211.121
					49.2458						139.288	20																												242.515	278.576	211.121
					49.2458						139.288	20																												242.515	278.576	211.121
					49.2458						139.288	20																												242.515	278.576	211.121
					49.2458						139.288	20																												242.515	278.576	211.121
					49.2458						139.288	20																												242.515	278.576	211.121
					49.2458						139.288	20																												259.921	278.576	211.121
					49.2458						139.288	20																												259.921	278.576	211.121
					49.2458						139.288	20																												259.921	278.576	211.121
					49.2458						139.288	20																												259.921	278.576	211.121
					49.2458						139.288	20																												259.921	278.576	211.121
					49.2458						139.288	20																												259.921	278.576	211.121
					49.2458						139.288	20																												259.921	278.576	211.121
					49.2458						139.288	20																												259.921	278.576	211.121
					49.2458						139.288	20																												259.921	278.576	211.121
					49.2458						139.288	21.4355																												259.921	278.576	211.121
					49.2458						139.288	21.4355																												259.921	278.576	211.121
					49.2458						139.288	21.4355																												259.921	278.576	211.121
					49.2458						139.288	21.4355																												259.921	278.576	211.121
					49.2458						139.288	21.4355																												259.921	278.576	226.274
					49.2458						139.288	21.4355																												259.921	278.576	226.274
					49.2458						139.288	21.4355																												259.921	278.576	226.274
					49.2458						139.288	21.4355																												259.921	278.576	226.274
					49.2458						139.288	21.4355																												259.921	278.576	226.274
					49.2458						139.288	21.4355																												259.921	278.576	226.274
					49.2458						139.288	21.4355																												259.921	278.576	226.274
					49.2458						139.288	22.974																												259.921	278.576	226.274
					49.2458						139.288	22.974																												259.921	278.576	226.274
					49.2458						139.288	22.974																												259.921	278.576	226.274
					49.2458						139.288	22.974																												259.921	278.576	226.274
					49.2458						139.288	24.6229																												259.921	278.576	226.274
					49.2458						139.288	24.6229																												259.921	278.576	226.274
					49.2458						139.288	24.6229																												259.921	278.576	226.274
					49.2458						139.288	24.6229																												259.921	278.576	226.274
					49.2458						139.288	24.6229																												259.921	278.576	226.274
					49.2458						139.288	24.6229																												259.921	278.576	226.274
					49.2458						139.288	24.6229																												259.921	278.576
					49.2458						139.288	24.6229																												259.921	278.576
					49.2458						139.288	24.6229																												259.921	278.576
					49.2458						139.288	24.6229																												259.921	278.576
					49.2458						139.288	24.6229																												259.921	278.576
					49.2458						105.561	21.4355																												259.921	278.576
					49.2458						105.561	21.4355																												259.921	278.576
					49.2458						105.561	21.4355																													278.576
					49.2458						105.561	21.4355																													278.576
					49.2458						105.561	21.4355																													278.576
					49.2458						105.561	21.4355																													278.576
					49.2458						105.561	21.4355																													278.576
					49.2458						98.4916	21.4355																													278.576
					49.2458						98.4916	21.4355																													278.576
					49.2458						98.4916	22.974																													278.576
					49.2458						98.4916	22.974																													278.576
					49.2458						98.4916	98.4916																													278.576
					49.2458						98.4916	98.4916																													278.576
					49.2458						98.4916	98.4916																													278.576
					49.2458						98.4916	98.4916																													278.576
					49.2458						98.4916	98.4916																													278.576
					49.2458						98.4916	98.4916																													278.576
					49.2458						98.4916	98.4916																													278.576
					49.2458						98.4916	98.4916																													278.576
					49.2458						98.4916	98.4916																													278.576
					49.2458						80	98.4916																													278.576
					49.2458						80	91.8959																													278.576
					49.2458						74.6426	91.8959																													278.576
					49.2458						74.6426	91.8959																													278.576
											74.6426	91.8959																													278.576
											74.6426	91.8959																													278.576
											74.6426																														278.576
											74.6426																														278.576
											69.644																														278.576
											69.644																														278.576
											69.644																														278.576
											69.644																														278.576
											74.6426																														278.576
											74.6426																														278.576
											74.6426																														278.576
											74.6426																														278.576
											74.6426																														278.576
											74.6426																														278.576
											74.6426																														278.576
											74.6426																														278.576
											74.6426																														278.576
											74.6426																														278.576
											80																														278.576
											80																														278.576
											80																														298.571
											80																														298.571
											80																														298.571
											80																														298.571
											80																														298.571
											105.561																														298.571
											105.561
											113.137
											113.137
											113.137
											113.137
											113.137
											113.137
											113.137
											113.137
											113.137
											113.137
											113.137
											113.137
											113.137
											113.137
											113.137
											113.137
											113.137
											113.137
											113.137
											113.137
											113.137
											113.137
											113.137
											113.137
											113.137
											113.137
											113.137
											113.137
											113.137
											113.137
											113.137
											113.137
											113.137
											113.137
											113.137
											113.137
											113.137
											113.137
											113.137
											113.137
											113.137
											113.137
											105.561
											105.561
											105.561
											105.561
											105.561
											105.561
											52.7803
											52.7803
											52.7803
											52.7803
											49.2458
											49.2458
											49.2458
											49.2458
											49.2458
											49.2458
											49.2458
											49.2458
											49.2458
											49.2458
											49.2458
											49.2458
											49.2458
											49.2458
											49.2458
											49.2458
											49.2458
											49.2458
											49.2458
											49.2458
											49.2458
											49.2458
											49.2458
											49.2458
											49.2458
											49.2458
											49.2458
											49.2458
											52.7803
											52.7803
											52.7803
											52.7803
											52.7803
											52.7803
											52.7803
											52.7803
											52.7803
											52.7803
											52.7803
											85.7419
											85.7419
											85.7419
											85.7419
											85.7419
											85.7419
											85.7419
											85.7419
											85.7419
											85.7419
											259.921
											259.921
											259.921
											259.921
											259.921
											259.921
											259.921
											259.921
											259.921
											259.921
											259.921
											259.921
											259.921
											259.921
											259.921
											259.921
											259.921
											259.921
											259.921
											259.921
											259.921
											259.921
											259.921
											259.921
											259.921
											259.921

## Sheet: Fig.5
Fig.5a	Ca2+ singal intensity									Fig.5b	Mean CWT ratio
islet id	islet 1	islet 2	islet 3	islet 4	islet 5	islet 6	islet 7			Period	islet 1	islet 2	islet 3	islet 1	islet 2	islet 3	islet 4	islet 5	islet 6	islet 1	islet 2	islet 3	islet 4	islet 5	islet 6	islet 7
alpha mass ratio	0.389	0.306	0.245	0.22	0.194	0.041	0.027			10	0	0.0199005	0.0646766	0.0199005	0.0447761	0.039801	0.00997506	0	0	0	0	0	0	0	0	0
islet diameter (um)	219	185	153	147	204	127	150			10.71	0.0348259	0	0.0497512	0.0298507	0.114428	0.0696517	0.0349127	0	0	0	0.00249377	0	0	0	0	0
islet area (um^2)	27823	22908	15753	13409	26747	12344	15742			11.48	0.0348259	0.0199005	0.0447761	0.0248756	0.144279	0.119403	0.0274314	0	0	0	0	0	0	0	0	0
0 s	46.889	45.986	38.349	30.517	46.524	56.452	41.795			12.31	0	0	0.039801	0.0199005	0.0547264	0.21393	0.032419	0	0	0	0	0	0	0	0	0
3 s	40.802	39.862	35.497	35.227	50.447	54.011	38.206			13.19	0	0	0.0298507	0	0.0447761	0.179104	0.0174564	0	0	0	0	0	0	0	0	0
6 s	37.164	39.368	37.612	51.14	46.884	53.107	37.251			14.14	0	0	0.0447761	0	0.0298507	0.134328	0.0299252	0	0	0	0	0	0	0	0	0
9 s	36.296	38.203	60.686	46.08	40.335	51.022	33.523			15.15	0	0	0.0746269	0	0	0.0845771	0.0349127	0	0	0	0	0	0	0	0	0
12 s	65.841	65.44	48.8	42.29	40.83	47.751	32.657			16.24	0	0.0696517	0.129353	0	0	0.00995025	0.032419	0	0	0	0	0	0	0	0	0
15 s	58.174	50.283	42.422	37.057	46.16	50.594	31.685			17.41	0	0.0945274	0.18408	0.00995025	0	0.0298507	0.0199501	0.0124688	0.0149254	0	0	0	0	0	0	0
18 s	49.362	41.995	38.408	37.396	58.929	46.133	32.442			18.66	0.268657	0.139303	0.208955	0.0248756	0.0149254	0.0348259	0.0473815	0.0374065	0.0248756	0	0	0	0	0	0	0
21 s	41.069	37.981	34.133	34.632	55.871	42.036	31.372			19.99	0.452736	0.402985	0.318408	0.0597015	0.174129	0	0.0922693	0.074813	0.00995025	0	0	0	0	0	0	0
24 s	39.757	36.277	36.487	67.323	53.359	39.483	37.459			21.43	0.681592	0.462687	0.487562	0.119403	0.38806	0.0497512	0.0972569	0.0997506	0	0	0	0	0	0	0	0
27 s	62.025	43.779	34.292	57.208	50.542	38.987	44.161			22.97	0.656716	0.467662	0.437811	0.164179	0.477612	0.0895522	0.0997506	0.0997506	0.0497512	0	0	0	0	0	0	0
30 s	64.03	56.656	33.835	54.838	69.232	35.774	40.805			24.62	0.437811	0.218905	0.427861	0.199005	0.41791	0.0945274	0.0972569	0.0673317	0.114428	0	0	0	0	0	0	0
33 s	53.682	43.697	33.158	51.081	64.694	34.441	41.135			26.39	0.0845771	0.0597015	0.0895522	0.169154	0.104478	0.0895522	0.0822943	0.0523691	0.139303	0	0	0	0	0	0	0
36 s	41.881	39.462	33.321	54.301	58.503	33.627	44.31			28.28	0	0	0.0746269	0.149254	0	0.0696517	0.0623441	0.0199501	0.114428	0	0	0	0	0	0	0
39 s	41.026	37.322	32.952	68.832	54.153	32.384	45.606			30.31	0	0	0.0248756	0.0746269	0	0	0.042394	0.0199501	0.0447761	0	0	0	0	0	0	0
42 s	48.193	36.369	33.804	58.467	56.236	34.374	52.236			32.49	0	0	0	0.0696517	0	0	0.042394	0	0	0	0	0	0	0	0	0
45 s	67.003	55.697	50.197	54.939	76.862	32.187	48.459			34.82	0	0	0	0	0	0	0.0473815	0	0	0	0	0	0	0	0	0
48 s	51.975	50.145	47.763	54.948	65.65	31.331	51.926			37.32	0	0	0	0	0	0	0.0299252	0	0	0	0	0	0	0	0	0
51 s	43.581	42.42	45.233	82.841	53.184	32.013	46.551			39.99	0	0	0	0	0	0	0	0	0	0	0	0	0	0	0	0
54 s	39.592	38.051	41.164	59.25	51.114	36.369	50.884			42.87	0	0	0	0	0	0	0.0299252	0	0	0	0	0	0	0	0	0
57 s	37.57	35.255	37.889	54.378	45.963	42.906	48.635			45.94	0	0	0	0	0	0	0.0922693	0	0	0	0	0	0	0	0	0
60 s	64.626	35.634	35.946	51.004	43.037	39.926	48.759			49.24	0	0	0	0	0	0	0.0922693	0	0	0	0	0	0	0	0	0
63 s	56.684	61.022	35.486	44.81	55.173	37.801	48.741			52.78	0	0	0	0	0	0	0.0698254	0	0	0	0	0	0	0	0	0
66 s	47.118	49.253	61.275	41.326	65.156	31.686	49.954			56.56	0	0	0	0	0	0	0	0	0	0	0	0	0	0	0	0
69 s	41.616	41.616	53.737	39.782	54.37	31.535	55.015			60.62	0	0	0	0	0	0	0	0	0	0	0	0	0	0	0	0
72 s	36.844	39.59	51.692	40.218	45.924	29.925	47.109			64.98	0	0	0	0	0	0	0	0	0	0	0	0	0	0	0	0
75 s	40.111	34.856	46.884	65.037	44.293	28.527	47.185			69.64	0	0	0	0	0	0	0	0	0	0	0	0	0	0	0	0
78 s	64.273	60.526	69.503	53.153	42.402	30.23	47.527			74.64	0	0	0	0	0	0	0	0	0	0	0	0	0	0	0	0
81 s	49.975	54.722	57.4	46.189	39.968	28.344	50.768			79.99	0	0	0	0	0	0	0	0	0	0	0	0	0	0	0	0
84 s	41.529	44.38	56.168	39.193	42.829	26.455	47.509			85.74	0	0	0	0	0	0	0	0	0	0	0	0	0	0	0	0
87 s	39.235	40.295	56.444	34.763	39.848	28.71	42.801			91.89	0	0	0	0	0	0	0	0	0	0	0	0	0	0	0	0
90 s	36.863	39.495	58.162	36.816	40.347	27.514	42.987			98.49	0	0	0	0	0	0	0.0822943	0	0	0	0	0	0	0	0	0
93 s	63.5	66.953	53.401	33.346	38.788	28.475	43.742			105.56	0	0	0	0.00497512	0	0	0.144638	0	0	0	0	0	0	0	0	0
96 s	53.72	53.15	51.842	55.026	54.046	26.289	48.209			113.13	0	0	0	0.0547264	0	0	0.194514	0	0	0	0	0	0	0	0	0
99 s	43.727	45.209	47.09	54.129	56.747	27.995	43.082			121.25	0	0	0	0.159204	0	0.0199005	0.219451	0	0	0	0	0	0	0	0	0
102 s	38.475	41.273	45.322	49.434	43.586	26.484	39.602			129.96	0	0	0	0.18408	0	0.0547264	0.201995	0.0673317	0	0	0	0	0	0	0	0
105 s	37.476	41.65	69.772	39.848	40.661	27.841	34.074			139.28	0	0	0	0.19403	0	0.0248756	0.19202	0.084788	0	0	0	0	0	0	0	0
108 s	47.671	73.361	57.408	36.6	40.042	28.614	33.251			149.28	0	0	0	0.323383	0	0	0.194514	0.0573566	0	0	0	0	0	0	0	0
111 s	60.714	55.994	48.713	35.24	39.071	27.761	32.97			159.99	0	0	0	0.422886	0	0	0.336658	0.0074813	0	0.177057	0.0249377	0	0	0	0	0
114 s	48.149	47.911	47	35.232	36.941	28.342	32.721			171.48	0	0	0	0.383085	0	0	0.319202	0	0	0.284289	0.00498753	0.0947631	0.102244	0	0	0
117 s	39.608	39.684	66.319	35.172	36.503	39.478	49.829			183.79	0	0	0	0.333333	0	0	0.34414	0	0	0.329177	0.129676	0.451372	0.389027	0	0	0
120 s	37.043	42.271	51.84	32.467	37.555	40.607	43.842			196.98	0	0	0	0.283582	0	0	0.294264	0	0.283582	0.206983	0.418953	0.488778	0.640898	0	0	0.0724095
123 s	36.453	74.176	44.169	32.611	36.65	41.792	41.477			211.12	0	0	0	0.233831	0	0	0.0897756	0.102244	0.233831	0.139651	0.61596	0.61596	0.61596	0	0	0.031211
126 s	67.135	54.723	44.549	31.319	37.266	48.866	40.955			226.27	0	0	0	0.0995025	0	0	0.0149626	0.189526	0.18408	0.321696	0.591022	0.38404	0.571072	0.0972569	0	0.183521
129 s	51.146	43.255	66.317	31.318	37.04	48.298	42.253			242.51	0	0	0	0	0	0	0	0.406484	0.124378	0.456359	0.561097	0.177057	0.182045	0.391521	0	0.237203
132 s	41.967	38.722	49.398	30.406	38.33	49.782	50.566			259.92	0	0	0	0	0	0	0	0.366584	0.0547264	0.448878	0.229426	0.119701	0.13217	0.526185	0.236273	0.280899
135 s	39.796	46.175	42.822	32.245	39.007	52.205	48.703			278.57	0	0	0	0	0	0	0	0	0	0.334165	0.129676	0	0.124688	0.491272	0.487521	0.611735
138 s	36.652	61.136	43.303	32.745	36.762	57.547	43.832			298.57	0	0	0	0	0	0	0	0	0	0.27182	0.0997506	0	0.0972569	0.456359	0.557404	0.550562
141 s	68.883	49.647	58.569	32.525	36.739	57.328	44.537			319.99	0	0	0	0	0	0	0	0	0	0.149626	0.104738	0	0.124688	0.224439	0.560732	0.444444
144 s	53.772	41.084	48.364	45.944	35.835	56.951	40.055			342.96	0	0	0	0	0	0	0	0	0	0.226933	0.13217	0	0.219451	0.0498753	0.490849	0.372035
147 s	43.084	38.947	42.719	47.258	36.045	60.77	36.533			367.58	0	0	0	0	0	0	0	0	0	0.256858	0.276808	0.331671	0.304239	0.0074813	0	0.0749064
150 s	39.107	37.305	41.392	45.783	51.081	57.146	33.887			393.96	0	0	0	0	0	0	0	0	0	0.281796	0.239401	0.281796	0.261845	0	0	0
153 s	37.138	63.056	56.54	42.487	50.615	60.202	31.78			422.24	0	0	0	0	0	0	0	0	0	0.23192	0	0.23192	0	0	0	0
156 s	70.424	51.527	50.929	44.011	45.687	52.63	30.44			452.54	0	0	0	0	0	0	0	0	0	0	0	0.177057	0	0	0	0
159 s	54.458	41.375	41.694	52.437	41.362	51.06	29.086			485.02	0	0	0	0	0	0	0	0	0	0	0	0	0	0	0	0
162 s	43.001	39.228	36.974	61.447	41.665	48.455	29.359			519.84	0	0	0	0	0	0	0	0	0	0	0	0	0	0	0	0
165 s	38.739	37.181	38.504	51.155	60.982	44.612	27.919
168 s	36.578	55.681	56.168	43.999	55.33	63.832	28.591
171 s	46.821	56.462	46.329	42.635	50.237	53.083	28.731
174 s	60.222	46.296	38.222	64.637	48.883	46.601	30.226
177 s	49.441	40.77	37.209	55.936	72.548	38.886	28.152
180 s	39.539	38.307	41.493	47.813	65.056	38.698	27.3
183 s	37.386	61.866	51.027	45.599	54.502	38.681	27.755
186 s	36.591	58.49	42.735	49.16	48.51	35.967	26.302
189 s	65.471	50.568	38.603	60.497	77.317	34.628	29.097
192 s	52.779	40.606	35.67	46.214	70.669	34.631	28.376
195 s	43.466	39.291	66.44	42.085	56.673	33.15	28.169
198 s	39.276	72.81	53.253	37.335	47.035	52.341	27.445
201 s	38.093	55.633	48.172	34.985	46.761	41.95	29.606
204 s	63.08	44.303	46.643	33.675	43.872	38.538	27.302
207 s	53.481	38.39	63.913	33.617	71.677	35.333	28.755
210 s	43.743	38.697	52.459	58.746	62.794	30.961	41.102
213 s	39.79	73.851	45.51	48.096	48.747	31.204	44.433
216 s	37.207	53.745	42.445	43.126	43.88	31.073	44.533
219 s	52.988	42.557	63.393	38.203	42.499	29.38	51.099
222 s	55.909	41.605	59.344	37.146	41.237	30.682	54.498
225 s	45.974	36.67	48.314	34.875	41.103	29.215	56.264
228 s	39.807	65.758	41.649	62.709	66.475	28.726	60.613
231 s	38.909	48.909	41.639	54.499	61.326	28.205	66.629
234 s	40.034	40.086	72.568	50.142	48.086	27.243	69.45
237 s	60.42	38.985	51.722	48.972	44.438	28.68	71.518
240 s	48.543	50.412	42.779	48.632	43.745	28.648	70.858
243 s	41.584	59.934	39.871	74.458	40.322	28.145	72.447
246 s	37.735	46.303	36.27	64.863	39.626	27.755	68.726
249 s	54.102	39.666	37.319	56.421	38.002	27.947	69.071
252 s	62.099	39.379	64.267	47.611	40.412	34.086	67.51
255 s	50.433	62.19	48.645	49.743	37.924	39.641	64.291
258 s	41.583	53.776	42.887	76.239	37.728	40.518	61.772
261 s	37.664	43.93	39.246	58.023	37.452	37.896	60.568
264 s	68.267	38.289	38.657	46.836	36.429	36.257	58.692
267 s	58.504	36.468	60.528	40.569	53.327	40.462	58.392
270 s	45.774	59.799	48.775	39.661	54.271	48.633	55.603
273 s	39.9	52.034	40.258	76.48	47.744	49.414	55.362
276 s	38.643	41.381	38.458	61.979	39.986	50.817	52.832
279 s	65.448	38.58	37.046	50.234	39.525	58.903	50.969
282 s	57.11	35.082	35.36	41.638	36.944	53.597	48.619
285 s	44.296	56.709	33.666	37.015	60.043	53.24	46.903
288 s	37.756	51.126	58.564	36.35	53.199	48.716	53.406
291 s	36.399	40.045	46.868	35.199	45.105	57.935	48.32
294 s	38.212	37.789	39.918	34.493	40.433	54.578	43.525
297 s	59.712	37.689	35.88	34.145	41.963	48.415	40.761
300 s	50.037	37.161	32.538	58.034	62.267	41.457	38.279
303 s	40.559	48.064	34.411	45.902	58.107	38.98	35.817
306 s	35.899	50.887	33.643	38.215	43.504	61.317	35.107
309 s	43.259	40.225	34.57	36.68	42.217	52.52	33.022
312 s	58.731	36.149	53.613	34.643	44.135	43.604	31.049
315 s	47.311	37.693	50.935	33.475	62.291	37.872	31.855
318 s	39.445	33.575	45.844	32.701	53.041	34.824	31.711
321 s	38.262	60.761	41.513	31.462	42.17	35.11	31.141
324 s	62.177	48.179	41.365	33.112	40.576	44.387	30.235
327 s	55.648	39.588	47.025	31.329	48.705	48.269	44.44
330 s	45.073	37.779	59.78	30.017	59.82	41.386	43.622
333 s	38.726	35.614	50.13	49.913	48.228	35.796	45.169
336 s	38.46	65.068	40.793	48.54	42.419	34.115	46.884
339 s	35.825	52.811	41.943	42.01	39.881	34.528	46.467
342 s	60.66	43.742	70.75	36.972	40.671	32.385	48.639
345 s	48.92	37.743	81.26	32.675	59.029	48.785	48.766
348 s	39.71	37.058	54.06	33.12	49.026	43.38	51.021
351 s	36.585	63.316	56.826	62.495	41.747	38.293	53.86
354 s	37.226	51.43	53.577	56.688	38.759	31.57	52.846
357 s	65.989	40.287	47.136	50.742	38.251	30.903	51.721
360 s	50.604	38.374	42.303	49.299	37.391	30.803	53.756
363 s	40.745	41.456	38.119	71.667	35.979	28.581	55.945
366 s	36.856	60.118	37.313	62.297	39.036	30.847	53.677
369 s	36.522	49.624	34.778	59.533	35.059	27.895	51.807
372 s	65.576	40.549	37.738	56.238	36.077	32.676	57.186
375 s	52.608	39.919	60.493	82.534	34.646	28.734	54.059
378 s	44.235	67.565	48.56	64.009	36.685	27.594	50.799
381 s	36.99	57.576	38.514	54.242	36.238	29.552	56.689
384 s	35.15	45.079	37.487	46.667	36.344	28.172	51.23
387 s	64.521	39.576	34.439	43.047	33.952	28.943	50.646
390 s	51.339	36.74	52.162	73.495	35.505	28.563	48.235
393 s	41.42	73.757	47.796	57.609	35.348	28.185	44.82
396 s	36.65	52.876	40.232	46.262	36.428	29.466	43.294
399 s	42.838	42.958	36.885	41.274	34.72	28.311	42.602
402 s	60.417	37.889	37.364	37.109	34.256	27.711	69.47
405 s	47.506	36.768	57.44	37.406	35.388	30.215	47.87
408 s	40.272	34.767	46.818	62.287	36.014	38.476	44.73
411 s	38.197	66.392	39.597	56.098	47.508	37.215	41.109
414 s	66.294	52.435	36.217	44.075	47.965	38.364	36.802
417 s	54.568	40.707	35.015	37.014	48.764	36.685	34.071
420 s	42.159	37.529	55.527	36.564	47.973	39.144	31.231
423 s	40.327	34.967	53.243	34.648	54.762	51.81	30.462
426 s	35.297	36.125	44.101	34.198	59.241	50.117	29.622
429 s	64.278	60.167	36.654	32.67	58.658	51.166	28.639
432 s	54.655	50.62	35.264	32.572	68.333	52.455	28.786
435 s	42.616	38.953	46.674	32.02	66.336	55.149	28.081
438 s	37.788	37.768	53.772	32.179	68.404	52.418	29.859
441 s	38.232	36.249	45.466	32.196	72.405	50.363	29.184
444 s	46.008	60.141	39.83	32.817	73.184	49.311	28.405
447 s	55.27	53.815	38.501	32.012	66.964	63.018	27.975
450 s	45.394	43.371	61.47	30.278	63.924	54.944	27.569
453 s	39.033	39.184	49.902	30.609	79.197	45.856	31.342
456 s	36.093	37.723	40.97	28.478	66.248	42.141	41.982
459 s	68.403	68.396	38.005	30.236	54.713	44.194	40.459
462 s	52.624	53.795	35.111	43.432	52.432	55.516	41
465 s	41.906	42.253	58.781	48.21	79.365	51.352	44.292
468 s	38.104	40.254	53.161	47.798	70.399	39.875	51.107
471 s	36.209	37.034	42.318	45.715	54.6	36.647	54.97
474 s	58.165	68.021	37.759	55.086	47.278	36.802	57.008
477 s	47.281	52.92	35.146	57.793	45.27	34.976	58.076
480 s	41.146	43.358	66.084	61.417	44.374	50.614	62.636
483 s	35.532	38.424	52.79	63.779	69.266	45.938	60.118
486 s	66.993	37.156	42.53	63.494	55.25	39.534	63.975
489 s	52.719	70.499	38.314	61.858	46.202	34.914	61.524
492 s	42.379	54.464	37.36	63.02	42.454	33.873	62.152
495 s	38.502	44.029	52.892	63.68	41.374	41.68	60.756
498 s	42.345	37.809	53.186	54.819	47.866	51.036	58.976
501 s	59.292	39.871	45.196	43.909	59.099	46.521	57.912
504 s	47.715	63.907	39.367	42.878	46.09	37.299	57.309
507 s	40.392	51.99	36.982	58.099	41.265	34.905	56.624
510 s	37.168	42.326	55.755	64.97	40.151	31.163	57.258
513 s	67.909	40.048	52.858	51.713	38.996	32.552	60.013
516 s	53.748	69.51	46.24	41.866	38.439	30.072	53.466
519 s	40.762	59.169	38.329	37.472	52.185	29.272	51.104
522 s	36.687	45.971	36.639	37.253	52.896	28.613	47.951
525 s	37.254	42.216	36.311	54.628	41.869	28.914	49.746
528 s	67.208	39.344	56.051	62.332	39.159	28.307	53.611
531 s	51.194	68.751	47.055	55.194	37.708	29.56	49.676
534 s	41.468	53.379	41.706	52.453	38.611	29.838	45.429
537 s	37.444	42.642	37.484	52.303	38.2	27.337	41.82
540 s	35.26	38.531	49.942	48.809	37.116	33.94	42.334
543 s	69.106	79.863	55.997	42.424	35.596	39.195	39.211
546 s	50.485	56.474	47.7	35.85	35.731	39.157	38.097
549 s	40.177	46.607	40.022	36.257	37.175	39.37	37.593
552 s	38.416	40.146	59.322	44.332	51.693	35.986	33.406
555 s	60.514	74.976	57.472	59.366	46.961	35.146	32.964
558 s	56.865	60.139	47.342	53.95	41.208	50.241	32.17
561 s	42.547	47.711	41.068	46.449	38.319	45.568	31.234
564 s	38.895	42.558	66.486	40.414	38.718	46.238	29.547
567 s	35.762	80.305	53.538	38.232	54.895	51.479	28.819
570 s	65.644	56.943	43.737	33.686	53.998	54.208	28.723
573 s	52.6	44.128	40.842	33.958	50.303	51.234	27.565
576 s	41.545	38.996	65.304	33.156	40.669	45.003	28.078
579 s	37.061	73.525	52.168	67.118	42.421	43.101	29.128
582 s	37.397	56.588	46.099	58.57	61.048	61.497	28.079
585 s	68.224	44.2	68.679	55.805	55.799	55.84	26.522
588 s	55.228	39.953	63.349	66.527	45.634	45.303	28.679
591 s	43.947	38.958	54.943	58.563	42.562	41.81	26.154
594 s	38.535	65.283	45.618	54.359	66.681	49.929	27.697
597 s	39.492	48.989	75.523	84.408	61.387	55.624	28.148
600 s	65.456	39.605	56.106	63.879	47.389	47.348	42.061
603 s	54.23	39.655	51.692	52.434	42.921	40.14	39.148
606 s	41.956	65.274	48.428	45.782	42.338	37.747	45.294
609 s	40.547	56.348	63.741	40.364	66.934	37.832	48.446
612 s	68.803	43.614	53.907	37.085	60.81	51.437	53.648
615 s	61.422	37.203	42.155	36.458	46.931	42.989	57.741
618 s	49.555	37.467	43.343	73.618	41.091	35.12	65.6
621 s	41.752	63.956	59.767	59.14	42.267	31.415	70.617
624 s	38.905	50.766	47.646	52.365	69.549	33.618	72.768
627 s	75.995	40.01	40.217	52.637	59.863	30.788	72.248
630 s	57.531	37.315	45.757	47.68	48.854	28.663	76.451
633 s	46.474	68.718	60.897	37.976	42.886	28.535	71.688
636 s	41.859	53.933	47.75	36.033	40.518	31.092	76.565
639 s	39.103	44.777	39.939	35.408	39.502	28.315	71.611
642 s	67.899	38.562	41.345	34.006	40.156	28.881	72.623
645 s	55.131	38.101	65.846	32.396	59.935	29.987	67.091
648 s	43.143	62.349	49.285	33.581	55.927	27.437	64.337
651 s	40.29	47.666	40.071	56.513	40.173	28.937	62.818
654 s	80.957	38.555	38.743	47.683	36.832	27.135	58.832
657 s	59.832	36.177	37.074	45.21	41.132	27.866	57.757
660 s	44.204	61.992	56.932	44.725	39.248	28.94	56.773
663 s	39.819	52.113	44.856	39.815	37.772	28.894	54.054
666 s	54.449	41.669	38.418	34.262	36.625	26.206	52.558
669 s	62.63	36.411	36.684	32.576	34.61	26.724	50.156
672 s	49.878	35.046	34.815	33.29	44.77	27.68	45.541
675 s	40.957	65.637	34.909	33.671	50.927	26.349	43.055
678 s	37.614	50.238	54.483	33.334	50.05	29.164	38.905
681 s	61.377	39.793	43.478	31.359	39.975	29.467	34.188
684 s	56.946	35.729	37.561	49.519	38.412	26.371	34.884
687 s	49.012	35.192	34.738	44.968	37.544	25.883	33.986
690 s	40.497	57.945	32.569	44.747	35.317	27.273	32.054
693 s	37.824	44.857	31.77	42.517	35.172	27.331	29.499
696 s	35.657	37.19	49.662	35.847	35.894	27.6	29.811
699 s	60.441	35.678	40.649	33.566	35.685	29.081	30.418
702 s	46.359	33.919	35.456	31.583	34.814	27.417	29.926
705 s	37.865	54.811	33.592	31.4	33.283	26.554	28.671
708 s	36.173	46.951	34.062	31.059	34.839	30.986	28.329
711 s	33.752	38.889	32.006	29.95	35.059	34.493	27.446
714 s	33.464	35.891	33.027	31.145	34.488	35.08	26.89
717 s	32.636	34.022	31.045	32.166	36.993	34.713	27.028
720 s	32.88	33.962	31.895	29.718	43.69	32.879	27.202
723 s	31.655	51.293	29.895	33.814	42.105	33.565	28.446
726 s	32.508	38.937	31.676	31.346	35.684	45.568	25.761
729 s	31.057	35.508	31.823	30.109	36.054	43.731	27.769
732 s	32.076	33.649	31.162	30.428	34.923	43.348	27.712
735 s	32.101	34.341	30.642	31.323	35.927	39.239	26.888
738 s	32.002	32.58	29.445	28.87	34.562	38.744	27.917
741 s	30.405	50.208	30.555	34.74	33.338	49.766	26.666
744 s	30.799	41.704	29.484	37.793	33.068	48.239	28.526
747 s	31.298	35.188	30.389	36.389	34.381	44.726	30.211
750 s	31.636	32.87	29.449	35.427	43.339	37.719	26.264
753 s	29.191	32.077	31.505	32.847	45.055	36.576	27.006
756 s	30.255	34.494	30.199	32.854	41.02	35.328	26.541
759 s	31.89	31.289	31.92	30.467	38.919	37.775	26.801
762 s	30.652	35.021	30.325	32.05	35.197	48.472	29.165
765 s	39.698	43.882	35.018	32.451	49.215	45.004	28.138
768 s	35.128	42.004	34.435	32.419	49.973	37.954	26.744
771 s	37.227	34.574	36.743	32.335	51.778	34.325	27.184
774 s	42.117	36.713	37.843	30.734	44.389	30.796	27.42
777 s	46.25	37.647	42.993	31.67	61.86	30.375	26.241
780 s	49.463	50.581	42.738	32.102	61.536	31.172	34.023
783 s	53.752	45.961	41.591	40.791	63.847	29.829	36.874
786 s	62.953	42.491	44.493	39.602	63.813	27.929	40.651
789 s	67.6	69.031	54.684	44.077	69.15	28.999	43.066
792 s	73.403	57.925	47.72	47.067	70.102	27.958	47.422
795 s	73.269	54.047	45.451	52.59	73.093	28.498	54.372
798 s	73.736	55.605	44.977	59.056	73.589	28.265	57.763
801 s	73.114	67.398	56.159	59.732	72.084	28.1	61.323
804 s	70.009	60.054	49.465	57.384	74.563	27.593	67.585
807 s	70.439	57.213	43.539	62.158	70.314	25.961	69.735
810 s	77.005	83.066	40.626	67.892	65.467	25.875	71.096
813 s	72.015	65.166	61.077	62.056	55.305	26.131	73.91
816 s	70.529	53.316	50.601	62.868	48.753	25.89	74.607
819 s	64.825	44.369	42.235	63.152	45.227	26.285	74.875
822 s	63.831	41.429	38.882	59.58	43.193	26.235	73.469
825 s	72.426	74.021	37.318	57.78	71.1	27.662	72.297
828 s	59.962	54.456	33.813	53.821	63.408	27.737	71.117
831 s	52.109	43.083	34.129	46.188	44.687	26.401	71.939
834 s	44.669	38.553	33.01	40.213	42.4	28.276	69.696
837 s	59.564	38.666	54.477	38.165	41.085	27.483	66.681
840 s	62.384	65.54	46.029	35.251	40.795	27.258	67.842
843 s	51.841	50.958	43.343	36.074	38.683	33.178	63.358
846 s	42.599	39.371	37.985	34.893	38.489	36.186	60.824
849 s	38.688	36.692	35.531	35.246	37.219	34.787	59.304
852 s	37.244	36.403	33.485	34.301	56.56	37.686	55.603
855 s	60.225	64.376	33.632	50.883	49.864	39.428	53.834
858 s	52.751	48.131	50.997	47.682	41.876	44.41	49.746
861 s	45.393	38.301	50.674	43.356	39.047	47.15	48.285
864 s	38.805	36.258	48.8	36.205	37.878	52.025	42.753
867 s	36.955	35.029	50.145	34.645	38.099	54.946	39.169
870 s	35.663	53.446	53.426	33.039	39.077	58.394	39.487
873 s	42.512	50.715	53.423	32.83	38.66	62.132	35.218
876 s	51.632	41.422	63.432	33.035	35.99	59.577	31.793
879 s	44.048	37.228	58.142	30.913	36.045	62.05	32.543
882 s	37.3	37.639	53.87	30.735	35.071	64.856	30.417
885 s	36.719	63.817	68.658	46.571	37.32	63.351	31.227
888 s	39.396	50.297	56.159	46.24	36.435	66.495	29.768
891 s	54.442	41.125	56.495	44.578	36.529	62.025	30.253
894 s	47.433	35.946	64.432	47.292	34.899	59.411	28.837
897 s	41.051	34.839	53.049	52.269	34.694	61.639	29.74
900 s	36.174	64.582	49.881	51.253	33.701	53.018	27.945
903 s	35.445	51.583	61.858	52.847	34.261	51.158	29.316
906 s	63.881	41.822	47.946	56.492	35.083	44.837	28.782
909 s	54.927	35.789	42.675	55.366	34.798	41.65	27.81
912 s	48.322	36.218	38.747	59.327	37.267	38.759	28.291
915 s	44.037	60.875	38.497	53.737	44.666	39.015	27.568
918 s	66.965	55.108	60.364	54.897	45.694	34.983	28.034
921 s	66.373	58.896	52.204	50.049	45.424	33.538	27.795
924 s	60.521	63.975	48.513	41.432	47.411	31.268	27.02
927 s	70.925	61.356	59.327	37.235	51.96	31.614	27.822
930 s	68.919	67.93	52.134	35.445	58.883	32.321	27.498
933 s	70.283	62.363	45.854	36.112	64.531	28.21	26.427
936 s	73.188	57.689	79.72	34.06	66.265	28.737	26.838
939 s	72.281	47.358	54.922	31.275	71.497	30.414	27.681
942 s	72.751	42.664	44.673	32.561	77.381	27.197	27.188
945 s	73.588	38.263	38.639	34.339	81.065	27.952	33.99
948 s	75.145	65.121	37.753	31.012	83.409	28.805	37.98
951 s	68.678	53.282	57.983	30.772	87.194	27.652	37.884
954 s	60.802	41.403	53.285	36.563	84.789	27.534	45.223
957 s	48.988	37.131	45.854	46.489	87.128	27.774	47.366
960 s	41.577	38.267	39.473	45.053	86.416	27.222	57.288
963 s	41.788	57.874	36.01	46.783	84.107	25.939	58.916
966 s	64.879	48.664	36.84	45.52	82.948	28.618	66.073
969 s	55.791	40.463	67.326	52.165	81.915	28.379	72.203
972 s	47.661	37.188	50.857	51.834	82.787	25.517	70.641
975 s	39.472	39.913	46.614	54.513	78.631	26.606	74.238
978 s	37.762	55.876	60.378	55.126	77.086	26.028	83.118
981 s	35.029	48.189	49.787	53.757	75.706	26.808	78.96
984 s	34.668	39.317	54.056	52.027	76.637	25.917	81.129
987 s	56.768	36.91	55.387	55.463	70.722	26.168	81.04
990 s	47.706	34.38	54.437	53.91	64.92	26.257	81.146
993 s	43.027	60.821	62.167	45.952	60.106	28.654	77.464
996 s	35.864	51.311	54.043	40.35	54.535	33.898	77.111
999 s	35.114	42.346	54.536	36.338	49.483	34.155	74.905
1002 s	33.558	36.03	60.89	36.359	48.389	36.815	72.955
1005 s	33.858	36.428	51.243	34.328	44.527	38.412	71.117
1008 s	59.215	63.252	49.564	32.028	41.867	43.436	70.774
1011 s	45.487	53.805	57.491	31.913	39.706	46.866	68.779
1014 s	48.131	49.275	47.528	31.687	64.541	49.295	65.819
1017 s	50.41	43.199	39.756	32.804	57.062	55.831	63.623
1020 s	61.568	38.351	36.93	31.62	47.65	58.986	61.525
1023 s	60.464	34.503	35.235	31.457	43.224	59.497	60.798
1026 s	64.187	77.803	33.685	31.781	40.162	64.132	57.874
1029 s	66.36	54.817	57.9	44.193	37.645	64.583	55.536
1032 s	65.456	53.003	49.993	44.956	39.641	66.618	55.118
1035 s	70.498	61.016	51.284	45.252	37.775	68.8	51.81
1038 s	74.812	62.387	54.644	48.292	58.971	68.787	47.91
1041 s	74.829	65.398	54.588	51.969	51.614	71.501	43.881
1044 s	72.343	66.2	53.914	58.32	44.349	69.592	41.785
1047 s	76.762	68.506	52.78	62.428	39.094	70.244	37.226
1050 s	72.847	67.79	49.289	62.009	37.797	68.721	36.437
1053 s	71.074	65.138	61.275	69.954	37.985	64.992	35.421
1056 s	74.68	77.267	56.364	72.418	37.221	62.636	33.286
1059 s	65.886	63.449	52.029	73.239	37.579	61.987	31.406
1062 s	59.819	54.113	45.78	68.938	36.822	60.52	29.118
1065 s	46.825	44.445	43.123	71.586	37.101	54.111	31.715
1068 s	43.351	41.822	73.486	70.951	37.509	50.502	30.957
1071 s	44.204	80.225	53.628	68.039	34.667	45.821	29.508
1074 s	65.971	58.904	51	65.516	35.952	41.089	29.423
1077 s	56.723	45.972	57.733	61.443	34.87	37.921	28.525
1080 s	50.456	39.364	50.215	57.995	36.372	36.726	28.157
1083 s	41.028	38.038	43.808	55.801	33.349	34.884	28.317
1086 s	37.5	67.822	73.481	52.808	35.399	32.723	28.813
1089 s	73.693	54.794	52.518	45.462	34.942	32.786	27.304
1092 s	55.209	43.404	49.717	40.13	35.819	29.964	27.435
1095 s	51.154	40.033	58.262	35.429	34.258	29.139	27.987
1098 s	40.681	37.245	51.757	35.816	33.486	44.714	27.071
1101 s	38.434	79.3	46.92	34.089	35.498	41.65	26.168
1104 s	44.857	53.157	51.317	33.949	34.953	42.322	26.844
1107 s	57.66	47.17	54.95	34.132	42.616	43.374	28.862
1110 s	52.633	38.984	43.024	32.59	43.497	47.548	27.518
1113 s	56.969	37.645	38.436	31.924	46.25	49.715	28
1116 s	61.239	64.203	36.401	31.612	50.358	50.602	26.227
1119 s	62.615	56.785	35.03	31.673	52.778	51.315	27.011
1122 s	66.89	53.881	34.232	30.408	61.081	56.847	28.255
1125 s	64.065	42.44	33.98	32.425	65.052	52.149	36.271
1128 s	73.161	38.801	31.432	29.783	71.939	52.067	36.398
1131 s	61.99	34.819	52.807	29.303	76.029	53.008	42.395
1134 s	64.042	76.036	49.885	28.624	77.278	51.185	45.095
1137 s	66.006	54.164	47.713	32.239	80.514	49.156	51.371
1140 s	66.343	53.821	54.712	30.655	84.402	49.962	65.773
1143 s	59.999	67.41	53.64	29.731	88.437	47.163	59.827
1146 s	63.173	61.625	54.564	31.547	87.721	38.842	67.971
1149 s	56.257	69.49	55.379	31.244	89.975	35.329	76.888
1152 s	46.017	64.166	54.055	30.386	90.113	30.623	77.538
1155 s	38.361	72.082	58.352	31.37	90.379	31.977	75.64
1158 s	36.755	61.84	55.569	29.821	91.721	32.204	86.85
1161 s	35.301	76.166	53.955	39.376	89.484	30.489	81.144
1164 s	36.372	63.825	59.201	46.813	86.094	29.396	79.071
1167 s	34.864	48.883	51.855	42.514	84.269	29.911	82.915
1170 s	50.694	41.646	47.447	47.671	83.12	29.293	86.116
1173 s	51.106	40.555	41.796	58.688	81.433	27.857	86.438
1176 s	47.937	38.272	37.874	66.972	78.632	27.429	74.738
1179 s	54.169	66.946	35.46	71.939	76.449	28.207	73.961
1182 s	59.725	51.631	34.611	77.394	72.112	27.695	73.765
1185 s	59.727	40.589	35.564	84.304	70.769	27.492	74.473
1188 s	60.457	38.436	31.577	82.372	68.966	27.901	70.76
1191 s	63.03	35.682	31.283	90.569	62.422	26.094	69.188
1194 s	75.002	66.665	30.989	99.477	57.792	26.677	68.598
1197 s	72.118	52.035	31.136	93.978	54.028	27.569	65.699
1200 s	66.447	43.505	31.045	92.515	48.725	28.204	62.376
1203 s	69.424	35.839	29.079	91.834	45.225	26.034	62.024
1206 s	75.026	36.258	31.471	90.981	44.768	27.316	61.024
1209 s	76.92	35.126	49.372	87.566	40.311	25.234	56.691
1212 s	78.092	65.057	47.577	78.875	39.625	27.679	55.017
1215 s	68.252	47.785	49.541	75.188	39.478	26.129	53.471
1218 s	67.661	44.364	58.416	73.499	41.101	27.103	53.985
1221 s	56.445	37.51	60.789	69.765	38.875	26.178	53.746
1224 s	48.835	35.488	68.933	65.238	35.982	27.123	49.437
1227 s	42.518	33.614	73.532	58.247	37.543	29.894	46.585
1230 s	67.676	34.976	73.324	48.396	35.803	29.611	44.54
1233 s	66.128	54.472	75.347	44.196	37.056	26.921	42.345
1236 s	58.79	47.888	75.177	40.349	37.012	26.494	37.887
1239 s	56.016	54.583	79.773	37.519	35.486	26.747	33.723
1242 s	52.435	59.595	79.852	35.788	35.529	26.945	32.697
1245 s	41.023	60.144	80.447	35.518	34.752	26.903	32.562
1248 s	39.152	66.179	79.097	35.352	35.871	30.131	29.601
1251 s	38.195	65.109	76.232	33.614	34.324	27.908	28.962
1254 s	34.901	69.597	76.552	31.462	35.997	34.106	30.316
1257 s	55.222	70.604	69.272	32.158	35.808	36.126	28.181
1260 s	50.023	67.739	67.49	31.792	31.625	37.211	29.092
1263 s	54.932	68.197	64.04	31.988	32.721	44.206	26.979
1266 s	57.489	66.363	60.602	31.955	34.431	48.276	27.841
1269 s	56.387	64.76	57.837	31.72	34.507	58.013	28.805
1272 s	66.258	65.305	53.325	30.711	32.996	56.08	28.331
1275 s	64.291	53.311	46.41	30.636	33.843	63.37	25.897
1278 s	61.415	43.138	39.835	29.427	34.11	66.232	27.298
1281 s	62.273	39.758	36.219	44.9	33.392	70.37	26.074
1284 s	63.893	39.417	37.941	43.174	34.31	79.445	25.701
1287 s	64.222	60.664	35.017	45.351	33.878	79.703	28.147
1290 s	64.217	52.233	34.727	48.424	34.707	79.833	27.402
1293 s	59.735	41.602	33.106	54.174	44.226	83.276	26.709
1296 s	59.329	38.117	30.821	59.272	46.949	80.298	25.42
1299 s	53.672	34.864	31.18	59.469	50.196	78.118	27.058
1302 s	43.506	34.722	30.018	69.91	52.852	82.226	27.093
1305 s	39.559	33.935	31.507	65.218	56.426	80.164	28.497
1308 s	36.183	34.408	29.989	79.995	62.781	76.645	27.984
1311 s	35.72	31.467	29.585	71.753	71.982	90.69	27.055
1314 s	33.908	32.682	30.303	69.994	76.915	77.071	27.28
1317 s	32.806	32.597	29.241	74.005	82.417	72.894	27.923
1320 s	32.342	31.731	29.409	68.36	94.17	69.697	25.796
1323 s	31.149	33.508	29.406	77.896	85.865	67.78	26.948
1326 s	32.219	31.743	29.29	68.849	93.372	65.637	26.983
1329 s	31.545	31.28	29.474	66.554	95.102	63.186	28.16
1332 s	31.388	30.11	30.768	61.5	95.279	58.438	27.863
1335 s	29.652	30.761	29.075	62.274	98.694	54.249	37.882
1338 s	30.155	30.147	30.284	57.535	97.373	48.796	39.798
1341 s	29.292	31.322	28.519	48.037	99.791	43.6	41.681
1344 s	29.103	30.853	29	42.801	101.119	40.335	53.259
1347 s	29.844	31.154	29.56	40.245	93.154	36.375	53.808
1350 s	30.866	33.021	30.068	39.537	93.183	33.52	63.238
1353 s	31.874	30.484	28.983	36.117	94.713	32.569	71.075
1356 s	30.151	31.248	31.642	33.621	89.704	31.932	70.951
1359 s	29.538	31.6	31.505	32.969	87.694	29.364	72.761
1362 s	30.393	32.048	45.431	34.47	86.004	30.733	76.425
1365 s	30.689	33.052	41.772	33.18	83.452	28.999	80.983
1368 s	30.903	42.071	64.911	30.732	79.669	28.731	80.652
1371 s	30.781	43.926	57.419	31.059	76.845	28.958	90.526
1374 s	28.846	49.294	68.527	30.788	72.887	28.703	94.371
1377 s	30.84	61.799	80.375	31.192	69.595	27.868	84.493
1380 s	40.292	65.267	82.918	30.732	62.851	28.631	89.932
1383 s	41.97	67.094	93.867	30.424	59.729	27.616	90.588
1386 s	43.527	84.818	105.997	29.989	53.982	27.184	84.874
1389 s	55.749	85.597	101	31.866	47.997	29.016	84.276
1392 s	50.257	101.076	104.508	32.114	48.147	27.385	86.623
1395 s	62.962	106.976	109.569	29.988	44.886	30.047	90.747
1398 s	64.11	100.93	101.852	30.186	42.951	26.84	77.602
1401 s	70.511	108.699	103.589	31.556	41.357	27.176	76.929
1404 s	83.382	110.988	104.886	29.748	41.215	28.542	75.038
1407 s	103.603	119.486	105.78	32.383	40.465	26.33	77.38
1410 s	111.056	117.508	106.825	30.134	38.012	26.037	73.773
1413 s	102.426	112.738	97.615	29.969	35.952	28.726	70.179
1416 s	103.018	112.947	94.942	31.299	35.874	28.318	67.874
1419 s	117.065	106.151	92.217	44.508	37.619	27.044	67.694
1422 s	110.288	99.812	84.791	43.026	37.398	26.807	67.801
1425 s	124.108	97.116	81.422	45.301	35.322	26.892	64.917
1428 s	111.117	91.379	78.794	54.048	35.526	27.112	63.407
1431 s	118.52	86.89	73.924	58.357	34.947	27.416	59.77
1434 s	110.649	83.386	70.897	62.182	36.046	27.164	59.419
1437 s	113.121	80.96	70.011	72.961	32.861	28.645	56.299
1440 s	104.931	78.046	66.588	70.919	34.709	28.09	58.313
1443 s	107.178	74.236	66.259	76.36	35.05	31.975	54.16
1446 s	105.803	70.156	60.121	83.008	34.928	36.382	52.265
1449 s	98.137	65.736	56.453	82.984	35.238	37.279	51.127
1452 s	93.91	62.644	54.551	83.641	34.311	40.029	48.744
1455 s	92.347	59.583	60.971	90.349	34.031	44.109	51.129
1458 s	88.655	53.246	53.084	93.556	34.563	47.883	48.156
1461 s	84.72	74.25	46.427	87.418	35.72	52.113	47.173
1464 s	84.746	64.444	40.08	90.747	33.925	60.599	44.96
1467 s	81.435	53.463	39.325	85.101	34.497	71.197	44.454
1470 s	78.99	44.242	35.954	83.296	34.066	62.528	40.489
1473 s	77.7	41.043	35.3	78.209	34.63	67.813	33.845
1476 s	72.788	90.049	50.263	75.609	32.812	75.186	33.189
1479 s	71.197	57.786	59.391	71.216	33.629	74.02	32.781
1482 s	65.453	48.694	54.354	68.14	34.419	75.108	31.698
1485 s	63.862	41.482	60.233	66.297	35.337	76.879	30.5
1488 s	80.196	38.972	58.305	63.968	44.892	76.254	28.64
1491 s	65.331	36.308	69.281	56.684	45.199	74.024	32.055
1494 s	62.452	62.952	65.638	51.658	49.462	75.002	28.198
1497 s	57.625	54.457	68.073	43.685	51.361	75.282	30.767
1500 s	44.551	58.989	68.663	40.195	58.314	72.679	28.61
1503 s	43.432	65.871	69.114	39.493	61.841	72.884	27.723
1506 s	91.736	64.574	73.966	40.6	73.718	72.14	26.521
1509 s	61.945	71.537	81.387	35.458	74.027	71.819	27.797
1512 s	64.636	69.514	72.94	36.483	75.859	69.468	28.25
1515 s	68.182	72.126	75.663	34.02	80.515	65.692	26.807
1518 s	64.814	71.629	74.078	32.306	87.041	64.892	28.022
1521 s	69.698	72.304	73.046	32.64	98.102	64.575	27.045
1524 s	73.396	68.341	69.223	32.01	91.33	61.715	26.446
1527 s	67.41	73.707	69.336	33.292	93.277	60.795	27.688
1530 s	77.137	64.471	65.474	31.516	95.035	57.387	27.191
1533 s	70.661	57.501	65.034	32.95	101.92	54.945	27.414
1536 s	75.261	97.57	62.658	44.166	102.165	52.92	26.832
1539 s	75.152	63.946	59.201	49.259	98.258	47.109	26.869
1542 s	71.391	51.352	61.642	52.696	94.854	44.2	28.486
1545 s	69.207	44.593	57.606	53.009	93.267	40.418	27.125
1548 s	71.666	42.996	57.615	57.893	93.307	38.101	26.83
1551 s	78.12	44.587	56.843	61.99	90.26	34.66	28.099
1554 s	66.357	59.844	55.173	62.823	89.504	32.503	26.599
1557 s	61.06	53.53	56.013	61.035	86.17	31.213	25.547
1560 s	50.203	57.013	51.527	67.062	83.037	31.182	37.932
1563 s	45.144	51.108	52.066	66.887	82.922	31.363	38.025
1566 s	41.06	78.883	68.589	70.493	80.688	30.392	51.606
1569 s	38.671	57.452	49.031	76.237	79.653	27.889	53.907
1572 s	72.905	70.661	42.715	77.514	76.882	28.227	65.015
1575 s	59.978	58.643	36.919	69.643	73.289	29.135	57.948
1578 s	62.626	69.422	35.659	66.866	71.599	28.666	65.767
1581 s	59.92	58.331	34.643	67.673	70.437	27.674	77.266
1584 s	73.601	66.516	33.162	66.542	62.243	28.718	73.386
1587 s	70.616	58.043	30.986	63.447	59.65	26.733	70.667
1590 s	69.615	59.054	31.446	59.752	58.174	27.59	76.114
1593 s	70.093	56.238	31.27	60.653	53.738	27.346	89.362
1596 s	69.402	44.662	30.296	56.822	51.264	27.31	79.199
1599 s	78.47	39.657	31.038	50.799	47.317	28.463	79.702
1602 s	74.466	38.937	29.574	41.283	45.093	26.411	83.177
1605 s	72.987	36.934	30.814	39.12	44.093	26.76	92.525
1608 s	69.291	37.372	30.708	38.179	41.181	27.424	79.13
1611 s	70.109	35.591	28.398	36.154	40.406	27.216	80.58
1614 s	69.847	35.246	29.038	34.572	37.997	27.321	79.269
1617 s	65.71	31.62	28.894	33.285	38.462	27.37	79.851
1620 s	66.733	32.021	28.791	34.225	39.833	27.178	77.551
1623 s	84.771	33.485	28.605	31.177	37.196	27.292	73.974
1626 s	63.382	32.957	44.006	32.791	35.879	27.436	73.402
1629 s	64.946	31.872	42.609	33.645	36.8	25.561	71.756
1632 s	63.62	32.029	41.896	31.06	33.709	26.09	71.551
1635 s	59.678	32.086	53.907	30.418	38.2	39.061	69.121
1638 s	48.086	32.739	57.74	30.713	35.884	34.551	69.035
1641 s	41.601	31.296	66.228	30.087	36.535	40.107	64.418
1644 s	38.773	30.891	69.847	31.104	34.407	41.087	62.724
1647 s	37.833	30.791	74.477	29.805	34.655	46.75	61.6
1650 s	34.514	32.609	85.42	30.355	36.509	54.084	61.537
1653 s	34.073	31.332	82.995	29.8	36.214	54.674	62.052
1656 s	34.487	29.594	96.695	30.145	35.608	62.78	56.677
1659 s	31.914	47.898	89.321	30.593	34.864	60.954	56.357
1662 s	33.222	47.499	94.393	29.745	33.332	62.171	54.925
1665 s	33.236	44.033	95.19	30.037	35.057	66.423	53.234
1668 s	31.187	62.445	96.342	30.14	35.818	70.874	54.399
1671 s	30.496	66.311	102.244	30.263	35.399	72.443	50.303
1674 s	29.445	66.54	92.234	30.441	33.5	83.5	51.47
1677 s	31.031	85.313	95.53	29.607	33.703	74.472	50.315
1680 s	30.567	78.168	95.462	29.842	34.014	80.607	49.321
1683 s	31.036	91.741	91.626	31.53	35.134	74.706	48.905
1686 s	31.043	106.541	93.029	40.23	44.369	72.907	48.865
1689 s	30.607	97.465	88.588	46.768	46.789	74.451	46.373
1692 s	30.401	113.467	87.814	48.59	49.488	69.047	43.426
1695 s	30.127	116.318	81.282	51.36	54.375	66.262	42.278
1698 s	29.933	109.219	79.955	55.648	58.211	68.293	43.614
1701 s	30.166	105.598	76.472	62.409	61.127	66.193	42.293
1704 s	32.131	117.706	73.21	76.864	69.206	63.56	41.79
1707 s	30.669	109.159	73.515	80.219	78.964	67.728	42.442
1710 s	42.033	108.501	70.723	76.581	79.555	61.463	41.661
1713 s	40.282	100.035	64.41	88.107	90.376	60.589	40.174
1716 s	44.634	95.746	62.567	93.202	83.681	59.45	34.22
1719 s	48.696	101.835	60.851	98.368	88.026	56.405	31.573
1722 s	53.309	87.639	59.862	101.979	89.95	53.669	33.031
1725 s	54.984	85.668	60.51	104.069	99.431	51.8	29.335
1728 s	65.984	81.323	55.911	107.204	94.024	49.315	28.19
1731 s	77.789	78.058	54.747	95.838	97.654	47.732	29.276
1734 s	74.395	74.118	57.474	100.43	101.853	46.3	29.498
1737 s	100.459	70.947	55.149	92.991	102.257	44.799	30.992
1740 s	92.639	70.808	54.166	95.251	98.184	48.456	31.579
1743 s	94.679	63.888	53.171	91.964	98.385	48.029	28.462
1746 s	107.453	62.294	48.592	93.838	90.031	46.197	48.403
1749 s	118.322	56.431	43.292	83.704	91.308	38.501	40.3
1752 s	116.177	51.039	44.289	78.69	90.906	33.483	39.968
1755 s	113.633	47.382	64.621	77.579	86.974	32.274	42.69
1758 s	108.407	79.701	60.657	75.066	86.189	32.18	48.01
1761 s	109.195	54.633	58.002	71.974	85.706	30.199	50.07
1764 s	108.351	42.318	58.98	67.975	80.656	29.815	58.982
1767 s	110.407	40.331	69.444	65.847	77.404	28.82	63.043
1770 s	107.18	37.076	56.342	62.277	75.537	28.943	59.587
1773 s	95.902	73.532	58.367	56.211	75.808	28.78	57.691
1776 s	103.351	53.357	58.646	55.381	72.345	28.96	60.833
1779 s	99.386	44.488	52.737	47.48	69.037	29.076	62.921
1782 s	94.38	39.528	59.278	41.936	67.772	27.205	63.636
1785 s	92.895	36.975	54.086	39.782	64.071	29.258	61.392
1788 s	86.849	62.85	56.19	37.916	59.011	25.554	62.648
1791 s	83.77	55.985	62.856	36.851	58.184	27.06	68.616
1794 s	81.346	50.396	56.93	37.458	55.036	28.382	70.619
1797 s	80.882	58.835	53.205	57.226	50.18	28.664	63.595
1800 s	77.116	61.657	60.14	51.155	45.859	27.7	63.056
1803 s	73.253	63.613	51.34	53.571	43.194	27.184	62.199
1806 s	69.199	67.854	46.46	52.858	43.124	26.274	60.495
1809 s	68.185	67.854	39.632	52.756	40.956	26.166	62.579
1812 s	64.801	68.048	36.696	55.037	37.476	26.86	58.557
1815 s	62.478	75.607	36.626	54.264	38.279	27.916	58.985
1818 s	72.604	69.475	33.138	54.643	38.216	28.053	56.769
1821 s	62.658	72.179	33.105	55.586	37.676	26.588	55.003
1824 s	58.867	76.856	32.303	55.598	38.728	26.899	56.806
1827 s	49.061	70.2	33.67	56.966	36.301	26.84	53.36
1830 s	48.703	77.412	30.26	55.899	34.707	26.728	51.835
1833 s	73.161	71.472	31.213	56.075	34.888	25.238	55.504
1836 s	57.669	72.74	30.768	59.544	35.672	26.97	51.857
1839 s	57.441	74.278	33.922	55.902	34.233	26.348	50.557
1842 s	55.522	77.947	30.931	56.945	35.994	35.752	49.328
1845 s	54.664	67.096	28.797	56.743	47.108	35.773	47.658
1848 s	64.16	64.772	29.465	52.087	44.377	39.332	48.849
1851 s	61.098	63.194	30.126	50.969	46.394	40.752	46.442
1854 s	54.748	54.477	28.646	43.762	48.743	50.135	44.947
1857 s	50.7	45.632	29.997	37.327	51.038	51.872	43.637
1860 s	83.659	41.683	28.806	35.591	55.767	53.714	54.585
1863 s	64.343	96.423	29.191	35.904	58.484	60.243	45.056
1866 s	58.797	56.491	30.493	35.381	60.669	58.746	45.62
1869 s	57.106	56.952	30.356	32.455	64.24	67.53	42.771
1872 s	61.412	58.023	29.049	33.349	65.583	65.579	41.888
1875 s	54.527	55.484	29.611	33.45	69.067	73.019	37.376
1878 s	56.728	60.282	29.529	31.283	73.037	77.319	34.807
1881 s	56.369	55.463	30.6	32.601	72.524	76.537	30.832
1884 s	51.35	57.508	43.202	30.796	74.307	78.858	30.651
1887 s	42.057	57.334	40.92	32.161	72.788	71.919	28.823
1890 s	37.614	55.511	48.24	30.53	73.982	74.523	27.521
1893 s	35.72	52.496	54.982	30.979	73.241	77.445	28.331
1896 s	36.396	46.665	66.904	29.607	77.786	76.661	26.294
1899 s	33.588	40.073	62.8	31.08	75.437	73.519	27.634
1902 s	32.693	37.465	76.868	30.174	75.04	70.827	28.771
1905 s	31.963	37.51	92.327	31.413	72.925	69.693	26.295
1908 s	32.746	34.675	96.831	31.381	73.434	68.168	27.847
1911 s	31.334	33.408	94.909	29.28	70.249	68.464	25.623
1914 s	32.108	33.129	93.209	33.155	72.954	65.838	26.355
1917 s	30.847	33.646	108.439	29.958	70.744	63.003	27.583
1920 s	30.421	32.928	101.122	30.519	68.515	62.472	28.406
1923 s	30.297	32.999	111.864	28.41	67.588	60.367	25.185
1926 s	30.681	31.453	105.322	31.071	66.975	59.561	28.377
1929 s	45.607	32.256	103.547	29.704	62.85	58.812	25.927
1932 s	43.405	31.677	104.808	30.71	59.282	55.538	27.551
1935 s	43.177	31.743	106.934	29.516	53.561	54.56	27.028
1938 s	48.562	30.425	107.828	29.741	48.139	53.502	26.549
1941 s	53.964	47.575	104.696	28.228	42.83	47.757	28.264
1944 s	60.42	40.16	102.316	29.85	41.264	48.028	25.362
1947 s	67.413	46.811	95.129	30.469	42.3	44.869	26.183
1950 s	66.822	53.066	92.932	31.27	39.222	45.822	26.772
1953 s	70.922	54.173	89.684	41.483	39.216	38.618	29.221
1956 s	81.265	66.247	83.529	42.82	38.354	34.074	26.704
1959 s	78.464	75.307	79.698	49.227	36.971	34.247	26.949
1962 s	73.628	78.594	75.93	54.087	38.078	31.438	38.452
1965 s	98.35	70.003	74.43	57.591	35.933	31.551	39.896
1968 s	77.395	78.292	71.193	70.093	36.814	30.96	51.38
1971 s	102.984	87.156	68.056	66.826	35.353	30.188	46.307
1974 s	90.478	83.734	65.626	73.147	35.44	30.235	55.973
1977 s	108.817	96.305	62.349	83.661	35.211	26.815	59.347
1980 s	100.626	100.108	59.915	82.542	37.373	30.161	77.369
1983 s	89.702	90.296	58.768	87.667	35.457	28.528	65.642
1986 s	89.954	93.66	59.095	94.931	35.274	28.222	67.063
1989 s	96.069	97.038	55.728	96.408	33.194	27.049	88.576
1992 s	87.24	94.196	56.078	97.855	35.833	26.735	74.195
1995 s	91.937	100.248	55.147	102.931	34.278	29.844	88.386
1998 s	88.574	92.252	54.096	101.994	35.71	28.031	86.916
2001 s	88.3	89.506	52.991	96.143	35.735	27.763	94.034
2004 s	83.214	81.96	53.954	95.093	34.755	27.229	80.555
2007 s	78.782	79.483	55.427	94.178	32.836	26.317	81.278
2010 s	78.189	78.638	59.436	87.273	34.107	27.266	79.317
2013 s	73.449	74.023	54.89	86.103	34.561	26.184	87.662
2016 s	73.245	71.365	57.591	85.572	33.588	27.692	83.897
2019 s	68.726	68.641	58.965	78.78	32.163	28.085	88.142
2022 s	66.2	65.008	61.331	75.35	33.505	27.001	76.616
2025 s	65.566	61.065	63.482	72.422	34.807	26.368	73.579
2028 s	61.9	56.131	56.494	68.003	34.1	29.309	75.048
2031 s	72.011	51.157	58.344	65.674	43.08	26.767	71.679
2034 s	61.322	43.145	73.641	62.159	45.614	27.276	68.895
2037 s	54.002	40.594	63.818	58.135	46.745	28.187	68.75
2040 s	46.754	38.751	59.159	48.489	51.681	27.028	67
2043 s	44.585	61.631	62.273	44.146	55.174	26.956	66.651
2046 s	83.865	52.53	56.673	39.525	56.66	27.706	62.22
2049 s	59.502	47.019	55.971	37.783	67.22	27.248	62.226
2052 s	53.566	41.699	54.947	38.978	66.707	27.636	61.379
2055 s	49.448	38.229	52.772	35.576	75.724	30.436	59.613
2058 s	40.228	38.159	51.019	35.469	76.349	33.693	57.547
2061 s	37.813	34.699	58.58	32.857	87.824	37.882	55.484
2064 s	41.302	35.179	51.209	33.445	91.191	41.442	51.99
2067 s	58.996	33.123	66.304	33.286	88.884	43.899	52.603
2070 s	51.45	32.942	53.54	31.502	94.258	49.073	50.616
2073 s	58.06	32.719	51.685	31.665	101.37	52.158	48.713
2076 s	57.944	31.706	63.069	30.776	94.71	60.552	46.49
2079 s	58.957	31.591	49.306	33.182	95.581	62.475	46.036
2082 s	63.154	30.001	50.125	33.972	94.024	69.231	44.953
2085 s	66.294	31.728	53.17	32.264	100.083	64.164	39.978
2088 s	63.742	29.495	50.296	30.924	93.881	67.95	35.196
2091 s	64.815	30.072	47.135	32.643	95.752	70.617	31.866
2094 s	74.798	32.362	51.119	31.639	89.707	72.189	31.145
2097 s	73.567	30.903	45.969	30.784	91.408	83.641	28.876
2100 s	72.776	31.969	42.033	31.454	88.647	74.751	30.547
2103 s	68.802	30.874	37.687	30.688	88.511	72.298	29.432
2106 s	73.018	30.357	35.954	29.759	84.429	76.008	29.71
2109 s	61.307	32.046	36.274	29.702	79.8	74.953	29.929
2112 s	91.971	31.497	32.055	30.713	80.309	77.071	27.314
2115 s	61.722	31.839	33.494	42.77	78.311	71.821	26.877
2118 s	64.94	30.409	33.36	44.765	76.538	68.573	29.547
2121 s	64.771	29.644	32.235	47.753	72.364	68.982	27.654
2124 s	61.747	30.274	32.476	55.437	70.679	69.222	28.023
2127 s	54.815	48.743	29.751	55.39	66.726	66.194	25.458
2130 s	46.04	49.707	30.874	61.676	61.245	65.28	29.131
2133 s	40.631	46.149	31.593	68.879	61.636	64.121	26.575
2136 s	39.18	49.541	30.357	72.759	58.031	60.917	27.404
2139 s	35.783	60.719	29.759	74.773	57.225	60.719	27.54
2142 s	33.522	69.481	29.916	92.04	53.783	60.117	27.465
2145 s	33.862	71.625	30.42	84.116	49.461	56.86	27.616
2148 s	33.102	84.207	30.107	93.643	44.264	56.989	26.387
2151 s	31.547	83.882	29.248	88.074	41.715	54.276	28.744
2154 s	33.073	93.428	30.682	91.731	41.292	51.493	27.095
2157 s	31.587	100.367	29.651	98.265	39.385	51.945	26.937
2160 s	32.548	114.223	29.311	94.367	38.527	48.421	27.248
2163 s	31.51	114.101	28.766	91.128	39.409	48.155	25.191
2166 s	31.73	107.369	27.576	84.889	38.227	44.191	26.836
2169 s	30.697	110.718	29.741	82.458	37.32	42.289	26.035
2172 s	29.738	107.69	30.583	80.667	36.56	36.653	27.815
2175 s	30.453	120.738	28.78	82.523	36.606	33.118	35.822
2178 s	30.673	112.566	28.859	77.47	35.697	32.916	41.726
2181 s	30.334	111.551	30.104	70.895	35.725	31.436	40.476
2184 s	30.117	105.724	29.128	70.377	33.715	30.543	45.33
2187 s	30.295	110.756	38.933	68.293	34.731	31.69	57.017
2190 s	29.26	100.904	42.129	66.092	34.595	29.999	50.939
2193 s	30.296	98.621	46.887	61.695	34.147	28.983	62.449
2196 s	29.185	103.027	51.633	59.338	35.593	29.045	71.386
2199 s	30.039	93.874	60.243	51.009	35.834	28.921	63.925
2202 s	30.053	89.729	70.569	42.598	34.598	26.921	79.921
2205 s	30.173	87.084	80.582	40.028	34.79	27.391	71.379
2208 s	28.357	83.573	86.76	37.508	35.331	25.997	78.547
2211 s	35.086	77.823	93.808	36.183	33.391	27.831	80.654
2214 s	40.083	75.483	94.838	35.228	34.805	26.802	76.534
2217 s	48.533	71.272	107.224	34.132	34.125	25.894	77.002
2220 s	43.137	69.336	98.921	33.772	34.134	27.075	75.919
2223 s	51.924	67.966	118.604	33.7	33.863	26.902	80.632
2226 s	65.064	65.695	116.385	31.224	33.421	28.982	88.932
2229 s	58.573	64.692	116.606	32.998	32.318	27.038	87.533
2232 s	72.912	62.729	113.003	31.495	35.068	27.049	80.294
2235 s	84.104	58.887	113.448	33.088	34.541	28.474	73.73
2238 s	73.651	53.443	117.735	30.401	34.194	27.27	77.173
2241 s	87.879	53.723	112.014	30.689	35.26	27.116	69.507
2244 s	91.97	64.939	107.524	30.498	35.783	26.642	70.5
2247 s	102.792	61.332	110.694	30.791	33.3	27.377	68.053
2250 s	103.531	52.045	104.1	39.344	34.087	26.091	67.987
2253 s	102.266	44.2	97.556	42.627	42.227	27.793	66.038
2256 s	102.23	41.185	94.501	44.207	44.224	28.866	62.741
2259 s	105.605	72.81	90.879	44.743	45.594	28.577	62.118
2262 s	102.963	55.207	85.688	47.601	48.409	27.246	60.071
2265 s	118.388	51.615	82.648	56.102	56.596	25.808	57.635
2268 s	115.407	62.014	80.081	63.447	59.91	27.709	58.491
2271 s	104.773	54.442	75.315	59.012	63.287	28.546	56.861
2274 s	115.485	80.035	72.203	70.191	67.58	28.424	54.307
2277 s	108.874	57.999	72.271	65.835	79.925	36.851	53.38
2280 s	100.988	76.44	66.385	82.995	83.352	36.749	51.463
2283 s	104.11	58.463	63.945	66.064	80.389	37.679	49.933
2286 s	107.787	60.891	63.574	72.736	83.081	44.024	49.584
2289 s	98.959	60.569	58.888	76.246	95.279	45.461	48.899
2292 s	96.422	55.778	56.855	85.957	87.416	49.427	46.071
2295 s	88.417	67.713	54.173	74.527	104.572	55.502	43.992
2298 s	86.921	56.172	50.257	77.953	90.736	57.901	42.588
2301 s	83.23	93.252	50.412	78.645	99.141	60.667	39.741
2304 s	82.04	58.432	54.652	75.653	92.654	66.125	35.588
2307 s	75.769	58.771	48.36	72.779	89.869	74.49	33.872
2310 s	77.62	64.415	40.884	69.335	92.389	67.402	31.966
2313 s	71.154	55.007	37.51	67.383	93.042	71.325	33.422
2316 s	68.496	61.611	37.203	65.915	91.475	72.647	30.668
2319 s	66.48	62.474	35.162	63.502	91.098	75.653	30.35
2322 s	64.638	55.801	33.611	61.288	88.233	71.489	31.21
2325 s	60.417	64.181	34.057	57.212	87.298	71.455	28.394
2328 s	54.672	57.7	32.744	56.83	85.034	74.166	31.638
2331 s	46.546	85.817	30.148	50.735	83.371	77.481	28.949
2334 s	44.945	54.271	31.857	43.696	80.32	72.884	27.36
2337 s	70.737	43.588	30.64	39.822	78.737	68.928	28.622
2340 s	58.794	39.694	29.734	38.554	77.528	68.517	26.902
2343 s	53.872	41.775	29.46	35.416	76.049	68.223	27.256
2346 s	41.505	36.216	32.956	34.129	71.767	67.038	26.74
2349 s	39.282	37.395	30.1	35.44	67.97	66.879	27.673
2352 s	37.947	34.278	30.099	32.576	66.67	62.923	27.013
2355 s	35.866	33.363	31.593	32.613	61.963	62.525	25.264
2358 s	36.206	32.595	30.152	32.163	60.225	62.481	27.541
2361 s	32.84	60.176	29.71	32.136	58.764	61.134	25.857
2364 s	31.812	46.707	30.767	32.396	55.241	57.944	26.337
2367 s	31.76	47.475	40.544	30.913	51.539	55.493	26.513
2370 s	32.467	51.389	41.494	31.825	49.296	54.871	26.166
2373 s	30.424	59.368	44.065	30.288	44.549	53.093	25.408
2376 s	32.443	58.744	57.125	29.773	43.239	48.679	26.253
2379 s	30.568	55.692	62.775	31.022	42.628	46.549	27.427
2382 s	31.402	61.126	64.926	31.533	40.967	45.047	26.67
2385 s	29.519	66.073	68.157	31.068	39.358	40.779	39.848
2388 s	31.481	63.839	77.53	28.643	36.642	40.011	36.458
2391 s	30.46	70.311	83.972	47.807	37.245	34.344	41.019
2394 s	29.353	70.46	88.548	49.54	37.342	32.219	43.363
2397 s	30.467	81.177	94.118	46.478	37.97	32.15	45.748
2400 s	29.952	68.538	93.765	48.88	35.72	32.205	50.523

## Sheet: Fig.6
Fig. 6b left panel	Ca2+ period (s)				cAMP			Fig. 6b right panel	Ca2+ period (s)								cAMP							Fig. 6b right panel	Ca2+ period (s)								cAMP
	10G	sst			10G	sst			10G	forskolin	washout						10G	forskolin	washout						10G	gcg	washout						10G	gcg	washout
	26	600			0.65477	0.208668			519	26	485						0.0757435	0.596734	0.0990905						600	28	452						0.235359	0.481583	0.0936167
	26	519			0.790941	0.208133			557	32	519						0.080013	0.592355	0.109547						242	28	519						0.433531	0.611345	0.198426
	28	557			0.786812	0.233778			342	42	319						0.0503909	0.542164	0.0386126						600	30	600						0.414458	0.581699	0.112935
	30	557			0.726386	0.400726			519	32	342						0.0856718	0.586101	0.130663						393	49	485						0.166248	0.634471	0.107724
	26	557			0.587635	0.261584																			519	52	393						0.318167	0.405743	0.109794
Test for normal distribution Kolmogorov-Smirnov test				Test for normal distribution Kolmogorov-Smirnov test				Test for normal distribution Shapiro-Wilk test	10G	forskolin	washout					Test for normal distribution Shapiro-Wilk test	10G	forskolin	washout					Test for normal distribution Kolmogorov-Smirnov test								Test for normal distribution Kolmogorov-Smirnov test
Group	10G	sst		Group	10G	sst		W	0.7814	0.916	0.8593					W	0.8551	0.782	0.9031					Group	10G	gcg	washout					Group	10G	gcg	washout
KS distance	0.3488	0.3139		KS distance	0.2117	0.3049		P value	0.0728	0.515	0.2577					P value	0.243	0.0737	0.4466					KS distance	0.2233	0.3307	0.1526					KS distance	0.211	0.2561	0.4085
P value	0.0462	>0.1000		P value	>0.1000	>0.1000		Passed normality test (alpha=0.05)?	Yes	Yes	Yes					Passed normality test (alpha=0.05)?	Yes	Yes	Yes					P value	>0.1000	0.0778	>0.1000					P value	>0.1000	>0.1000	0.0065
Passed normality test (alpha=0.05)?	No	Yes		Passed normality test (alpha=0.05)?	Yes	Yes		P value summary	ns	ns	ns					P value summary	ns	ns	ns					Passed normality test (alpha=0.05)?	Yes	Yes	Yes					Passed normality test (alpha=0.05)?	Yes	Yes	No
P value summary	*	ns		P value summary	ns	ns																		P value summary	ns	ns	ns					P value summary	ns	ns	**
Mann Whitney test				Unpaired t test				Tukey's multiple comparisons test	Mean Diff.	95.00% CI of diff.	Below threshold?	Summary	Adjusted P Value			Tukey's multiple comparisons test	Mean Diff.	95.00% CI of diff.	Below threshold?	Summary	Adjusted P Value			Tukey's multiple comparisons test	Mean Diff.	95.00% CI of diff.	Below threshold?	Summary	Adjusted P Value			Unpaired t test	10G v.s. gcg
P value	0.0079			P value	<0.0001			10G vs. forsko	451.3	237.7 to 664.8	Yes	**	0.0063	10G-forskolin		10G vs. forsko	-0.5064	-0.5333 to -0.4795	Yes	****	<0.0001	10G-forskolin		10G vs. gcg	433.4	187.6 to 679.2	Yes	**	0.0072	10G-gcg		P value	0.009
P value summary	**			P value summary	****			10G vs. washout	68	-84.41 to 220.4	No	ns	0.2922	10G-washout		10G vs. washout	-0.02152	-0.07166 to 0.02861	No	ns	0.3113	10G-washout		10G vs. washout	-19	-296.4 to 258.4	No	ns	0.9679	10G-washout		P value summary	**
Significantly different (P < 0.05)?	Yes			Significantly different (P < 0.05)?	Yes			forsko vs. washout	-383.3	-602.9 to -163.6	Yes	*	0.0109	forskolin-washout		forsko vs. washout	0.4849	0.4400 to 0.5297	Yes	****	<0.0001	forskolin-washout		gcg vs. washout	-452.4	-587.7 to -317.1	Yes	***	0.0006	gcg-washout		Significantly different (P < 0.05)?	Yes
One- or two-tailed P value?	Two-tailed			One- or two-tailed P value?	Two-tailed																											One- or two-tailed P value?	Two-tailed
																																t, df	t=3.428, df=8
																																Mann Whitney test	10G v.s. washout	gcg v.s. washout
																																P value	0.0159	0.0079
																																P value summary	*	**
																																Significantly different (P < 0.05)?	Yes	Yes
																																One- or two-tailed P value?	Two-tailed	Two-tailed
																																Sum of ranks in column A,C	39 , 16	40 , 15
																																Mann-Whitney U	1	0
